# Supplementary material for: Combined data-driven and mechanism-based approaches for human-intestinal-absorption prediction in the early drug-discovery stage
Source: Royal Society of Chemistry journal article supplement (doi:10.1039/d3dd00144j), 2023-01-01
Supplement: d3dd00144j1.pdf [file d3dd00144j1.pdf]

## Supporting Information

# Combined Data-driven and Mechanism-based Approaches for Human-Intestinal-Absorption Prediction in Early Drug-Discovery Stage

*Koichi Handa<sup>1\*</sup>, Sakae Sugiyama<sup>2</sup>, Michiharu Kageyama<sup>1</sup>, and Takeshi Iijima<sup>1</sup>*

<sup>1</sup>Toxicology & DMPK Research Department, Teijin Institute for Bio-medical Research, Teijin Pharma Limited, 4-3-2 Asahigaoka, Hino-shi, Tokyo 191-8512, Japan.

<sup>2</sup>Medicinal Chemistry Research Laboratories, Teijin Institute for Bio-medical Research, Teijin Pharma Limited, 4-3-2 Asahigaoka, Hino-shi, Tokyo 191-8512, Japan.

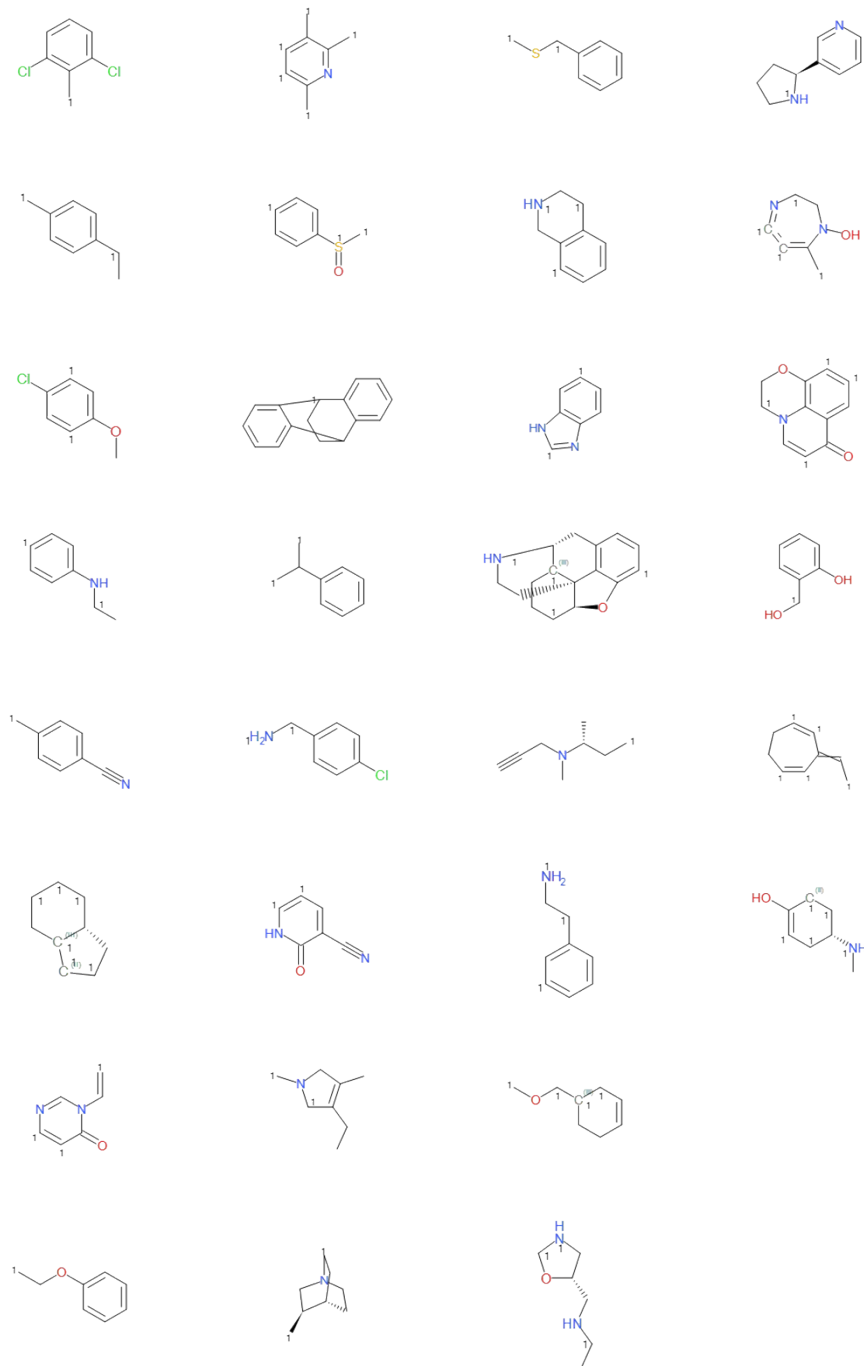

**Figure S1** Important substructures for positive Fa

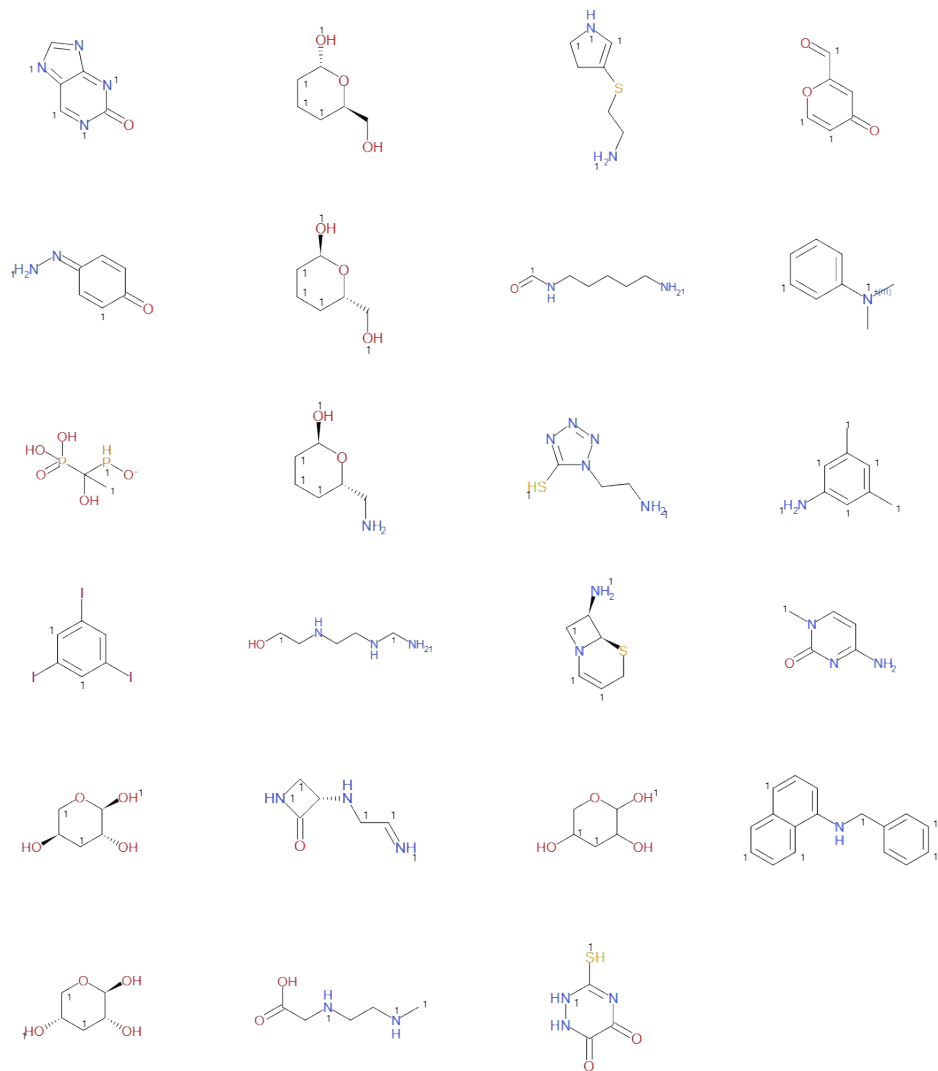

**Figure S2** Important substructures for negative Fa
