# Supplementary material for: Combined data-driven and mechanism-based approaches for human-intestinal-absorption prediction in the early drug-discovery stage
Source: Royal Society of Chemistry journal article supplement (doi:10.1039/d3dd00144j), 2023-01-01
Supplement: d3dd00144j2.xlsx [file d3dd00144j2.xlsx]

## Sheet: Table S1
Table S1 Dose Information
No.	Name	Canonical smiles	Fa (%)	Do	Dn	Pn	Dose	Source of Information of Dose (*: Dose was estimated to be same with intravenous administration. **: Dose was estimated to be same with its pro-drug form. ***: Dose was estimated to be same with its active metabolite form. ****: Dose was estimated to be same with pulmonary administration.)
1	AAFC	FC1C(N=C2N(C=1)[C@@H]3O[C@@H]([C@@H](O)[C@@H]3O2)CO)=N	32	0.027803	10926.4	0.155966	660	J Pharm Sci. 2001;90(6):749-784.
2	Acarbose	O([C@H]1O[C@@H]([C@@H](O[C@H]2O[C@@H]([C@@H](N[C@H]3C=C([C@@H](O)[C@H](O)[C@H]3O)CO)[C@H](O)[C@H]2O)C)[C@H](O)[C@H]1O)CO)[C@@H]4[C@H](O[C@@H](O)[C@H](O)[C@H]4O)CO	1	0.005246	11920.1	0.102385	200	Arzneimittelforschung. 1989;39(10):1254-1260.
3	Acebutolol	C(=O)(c1c(OCC(O)CNC(C)C)ccc(NC(=O)CCC)c1)C	89.5	0.000729	569.005	0.604929	300	Clin Pharmacol Ther. 1976;19(4):416-420.
4	Acefylline	C(=O)(O)Cn1c2C(=O)N(C(=O)N(c2nc1)C)C	5	0.001893	671.602	0.074918	500	https://www.druginfosys.com 24th June, 2019 Accessed.
5	Acetaminophen	C(=O)(Nc1ccc(O)cc1)C	100	0.598911	1636.06	4.60809	750	Eur J Clin Pharmacol. 197720;11(4):283-286.
6	Acetylsalicylic acid	C(=O)(Oc1c(C(=O)O)cccc1)C	84	0.005972	417.822	0.163729	1200	J Pharm Sci. 2001;90(6):749-784.
7	Acrivastine	C(=O)([O-])/C=C/c1nc(/C(/c2ccc(cc2)C)=C/C[NH+]3CCCC3)ccc1	88	0.158675	9.35548	0.0085949	6	J Pharm Sci. 2001;90(6):749-784.
8	Acyclovir	O=C1c2c(n(cn2)COCCO)NC(=N1)N	29	0.405927	140.158	0.0515601	350	J Pharm Sci. 2001;90(6):749-784.
9	Adefovir	O=P(O)(O)COCCn1c2c(c(ncn2)N)nc1	16	8.29e-05	688.599	0.602978	180	Antimicrob Agents Chemother. 1995;39(11):2401-2405.
10	Adinazolam	N(Cc1nnc2n1-c3c(C(c4ccccc4)=NC2)cc(Cl)cc3)(C)C	100	0.442275	7.3812	8.34011	15	Pharm Res. 1991;8(2):162-167.
11	Alfentanil	C(N(c1ccccc1)C2(COC)CCN(CCN3C(=O)N(N=N3)CC)CC2)(=O)CC	100	0.011162	150.818	19.1673	2.5	Clinical Pharmacol Ther. 2004;76(5):452-466.
12	Alizapride	C(=O)(c1c(OC)cc2c(n[nH]n2)c1)NCC3N(CC=C)CCC3	100	0.833798	83.3279	0.942344	187.5	https://hellodoktor.com 24th June, 2019 Accessed.
13	Allopurinol	O=C1C2C(=NC=N1)NNC=2	90	5.52263	74.4148	1.23044	300	Eur J Clin Pharmacol. 1982;22(1):77-84.
14	Alprazolam	Clc1cc2C(c3ccccc3)=NCc4nnc(n4-c2cc1)C	92	0.06229	0.646393	4.31884	1	Psychopharmacology (Berl). 1984;84(4):452-456.
15	Alprenolol	O(c1c(cccc1)CC=C)CC(O)CNC(C)C	93	0.000105	1146.32	3.99933	100	https://drugs.ncats.io/ 24th June, 2019 Accessed.
16	Amantadine	C12(N)CC3CC(C1)CC(C2)C3	95	1.78e-05	1688.38	2.25177	200	https://www.mayoclinic.org/drugs-supplements 24th June, 2019 Accessed.
17	Amiloride	C(N=C(N)N)(=O)c1c(nc(c(Cl)n1)N)N	50	0.066244	82.9519	0.863884	20	J Pharm Sci. 2001;90(6):749-784.
18	Aminopyrine	N(C1C(=O)N(c2ccccc2)N(C=1C)C)(C)C	100	0.783502	341.974	11.3311	250	J Pharm Sci. 2001;90(6):749-784.
19	Amiodarone	C(=O)(c1c2c(oc1CCCC)cccc2)c3cc(I)c(OCCN(CC)CC)c(I)c3	100	0.933716	139.44	19.4197	400	Clinical Pharmacol Ther. 1985;37(2):118-123.
20	Amisulpride	C(=O)(c1c(OC)cc(c(S(=O)(=O)CC)c1)N)NCC2N(CC)CCC2	48	0.003224	353.078	0.307882	175	CNS Drugs. 1996;6(3):237-256.
21	Amitriptyline	N(CCC=C1c2c(cccc2)CCc3c1cccc3)(C)C	95	0.010579	140.876	22.2273	25	https://www.medicines.org.uk/emc 24th June, 2019 Accessed.
22	Amlodipine	C(=O)(OCC)C1=C(NC(=C(C(=O)OC)C1c2c(Cl)cccc2)C)COCCN	95	9.94e-05	359.447	13.1762	10	Br J Clin Pharmacol. 1986;22(1):21-25.
23	Amoxicillin	C(=O)([C@@H](c1ccc(O)cc1)N)N[C@@H]2C(=O)N3[C@@H](C(=O)O)C(S[C@@H]32)(C)C	93	0.074062	266.402	0.472882	687.5	J Pharm Sci. 2001;90(6):749-784.
24	Amphetamine	c1(ccccc1)CC(N)C	90	7.64e-07	9342.96	2.76235	20	J Pharm Sci. 2001;90(6):749-784.
25	Amphotericin B	C(=O)(O)[C@H]1[C@H]2O[C@@](O)(C[C@@H]1O)C[C@@H](O)C[C@@H](O)[C@H](O)CC[C@@H](O)C[C@@H](O)CC(=O)O[C@H]([C@@H]([C@H](O)[C@H](C=CC=CC=CC=CC=CC=CC=C[C@H](O[C@@H]3O[C@@H]([C@@H](O)[C@@H]([C@@H]3O)N)C)C2)C)C)C	5	1.01954	33.4818	1.18681	100	https://pdr.net/drug-summary 24th June, 2019 Accessed.
26	Ampicillin	C(=O)([C@@H](c1ccccc1)N)N[C@@H]2C(=O)N3[C@@H](C(=O)O)C(S[C@@H]32)(C)C	57.6	0.011367	280.22	0.574557	500	J Pharm Sci. 2001;90(6):749-784.
27	Amrinone	O=C1C(=CC(c2ccncc2)=CN1)N	93	0.352583	137.329	0.596414	112.5	J Pharm Sci. 2001;90(6):749-784.
28	Antipyrine	O=C1N(c2ccccc2)N(C(=C1)C)C	97	0.616441	1151.45	9.11531	600	J Pharm Sci. 2001;90(6):749-784.
29	Ascorbic acid	O=C1C(=C(O)[C@H](O1)[C@@H](O)CO)O	35	0.000211	23324.3	0.971737	1000	J Pharm Sci. 2001;90(6):749-784.
30	Atenolol	C(=O)(Cc1ccc(OCC(O)CNC(C)C)cc1)N	50	9.2e-05	2386.12	0.598079	200	J Pharm Sci. 2001;90(6):749-784.
31	Atomoxetine	O(c1c(cccc1)C)[C@@H](c2ccccc2)CCNC	100	0.000953	300.489	16.3254	73.3	https://www.accessdata.fda.gov/drugsatfda_docs/label/2011/021411s035lbl.pdf 24th June, 2019 Accessed.
32	Atovaquone	O=C1C(=O)C(=C(c2c1cccc2)O)C3CCC(c4ccc(Cl)cc4)CC3	6	24.4604	0.545954	4.81294	750	https://www.accessdata.fda.gov/drugsatfda_docs/label/2008/020500s010lbl.pdf 24th June, 2019 Accessed.
33	Atropine	C(=O)(OC1C[C@H]2N([C@@H](C1)CC2)C)C(c3ccccc3)CO	98	1.21e-06	998.744	0.593441	2	J Pharm Sci. 2001;90(6):749-784.
34	Azithromycin	N([C@@H]1[C@@H](O)[C@H](O[C@H]2[C@](O)(C[C@H](CN([C@@H]([C@H]([C@](O)([C@H](OC(=O)[C@@H]([C@@H](O[C@@H]3O[C@H]([C@@H]([C@](OC)(C3)C)O)C)[C@@H]2C)C)CC)C)O)C)C)C)C)O[C@@H](C1)C)(C)C	60	0.011756	538.842	17.3701	500	J Pharm Sci. 2001;90(6):749-784.
35	Azosemide	O=S(=O)(c1c(Cl)cc(c(-c2nn[nH]n2)c1)NCc3sccc3)N	20	0.191097	100.444	0.126688	50	J Pharm Sci. 2001;90(6):749-784.
36	Aztreonam	C(/C(=N\OC(C(=O)O)(C)C)/c1nc(sc1)N)(=O)N[C@@H]2C(=O)N(S(=O)(=O)O)[C@H]2C	1	0.000937	404.937	0.415089	500	J Pharm Sci. 2001;90(6):749-784.
37	Balsalazide	C(=O)(c1ccc(N/N=C2\C=C(C(=O)O)C(=O)C=C\2)cc1)NCCC(=O)O	5	0.014137	290.808	0.522755	750	https://www.mayoclinic.org/drugs-supplements 24th June, 2019 Accessed.
38	Benazepril	C(=O)(OCC)[C@H](CCc1ccccc1)[NH2+][C@@H]2C(=O)N(c3c(cccc3)CC2)CC(=O)[O-]	37	0.001768	311.474	2.9371	20	J Pharm Sci. 2001;90(6):749-784.
39	Benserazide	C(=O)(C(CO)N)NNCc1c(c(c(O)cc1)O)O	70	0.009691	659.964	0.706551	25	https://www.medicines.org.uk/emc 24th June, 2019 Accessed.
40	Benzylpenicillin	C(=O)(N[C@@H]1C(=O)N2[C@@H](C(=O)O)C(S[C@@H]21)(C)C)Cc3ccccc3	22.5	0.000312	569.799	0.0371151	500	J Pharm Sci. 2001;90(6):749-784.
41	Betaxolol	O(c1ccc(cc1)CCOCC2CC2)CC(O)CNC(C)C	100	0.000107	396.343	1.41938	20	J Pharm Sci. 2001;90(6):749-784.
42	Biperiden	C(c1ccccc1)(O)(C2C3C=CC(C2)C3)CCN4CCCCC4	100	0.000104	188.811	14.5666	3.1	Eur J Clin Pharmacol. 1986;29:735-737.
43	Bisoprolol	O(c1ccc(cc1)COCCOC(C)C)CC(O)CNC(C)C	95	0.000125	784.21	0.734517	100	Journal of Cardiovascular Pharmacology 1986;8:S16-S20.
44	Bornaprine	C(=O)(OCCCN(CC)CC)C1(c2ccccc2)C3CC(C1)CC3	100	9.71e-05	186.075	16.8036	1.8	Xenobiotica. 1980;10(12):873-888.
45	Bretylium tosylate	Brc1c(cccc1)C[N+](CC)(C)C	23	0.283946	36.0509	5.95496	102.5	J Pharm Sci. 2001;90(6):749-784.
46	Bromazepam	O=C1Nc2c(C(c3ncccc3)=NC1)cc(Br)cc2	84	0.082794	6.74393	4.01301	6	J Pharm Sci. 2001;90(6):749-784.
47	Bromfenac	C(=O)(c1c(c(ccc1)CC(=O)O)N)c2ccc(Br)cc2	100	0.281963	79.7143	16.8082	50	Ann Pharmacother. 1997;31(4):395-399.
48	Bromocriptine	C(=O)(N[C@]1(C(=O)N2[C@](O1)(O)[C@H]3N(C(=O)[C@@H]2CC(C)C)CCC3)C(C)C)[C@@H]4C=C5c6c7c(c(Br)[nH]c7ccc6)C[C@H]5N(C4)C	28	0.229472	3.80468	15.2352	1.5	J Pharm Sci. 2001;90(6):749-784.
49	Budesonide	C(=O)([C@]12[C@@]3([C@H]([C@H]4[C@@H]([C@@]5(C(=CC(=O)C=C5)CC4)C)[C@@H](O)C3)C[C@H]1OC(O2)CCC)C)CO	100	0.772016	6.61673	13.8735	9	https://www.accessdata.fda.gov/drugsatfda_docs/label/2009/021324s008lbl.pdf 24th June, 2019 Accessed.
50	Buflomedil	C(=O)(c1c(OC)cc(OC)cc1OC)CCCN2CCCC2	100	0.000563	341.448	0.665517	300	Eur J Clin Pharmacol. 1981;20(6):459-463.
51	Bufuralol	C(NCC(c1oc2c(c1)cccc2CC)O)(C)(C)C	100	0.000802	295.674	17.0119	30	Eur J Clin Pharmacol. 1986;30(6):649-652.
52	Bumetanide	C(=O)(c1cc(S(=O)(=O)N)c(Oc2ccccc2)c(NCCCC)c1)O	90	0.000426	189.05	19.125	0.5	J Pharm Sci. 2001;90(6):749-784.
53	Bupivacaine	C(=O)(Nc1c(cccc1C)C)C2N(CCCC)CCCC2	90	0.051791	155.398	22.3205	57.5	https://www.maruishi-pharm.co.jp/media/PCI0.25_0.75_if_20211201.pdf 24th June, 2019 Accessed.	*
54	Bupropion	C(=O)(c1cc(Cl)ccc1)C(NC(C)(C)C)C	87	0.073976	186.573	22.1066	125	J Pharm Sci. 2001;90(6):749-784.
55	Busulphan	O=S(=O)(OCCCCOS(=O)(=O)C)C	94	5.8e-06	83901.3	0.262507	2	https://reference.medscape.com 24th June, 2019 Accessed.
56	Caffeine	O=C1c2c(ncn2C)N(C(=O)N1C)C	100	0.083398	2104.66	2.80014	150.5	J Pharm Sci. 2001;90(6):749-784.
57	Camazepam	C(N(C)C)(=O)OC1C(=O)N(c2c(C(c3ccccc3)=N1)cc(Cl)cc2)C	100	1.81812	3.94672	10.9357	20	J Pharm Sci. 2001;90(6):749-784.
58	Captopril	C(=O)(N1[C@H](C(=O)O)CCC1)[C@@H](CS)C	84	0.000109	1896.87	0.100016	100	J Pharm Sci. 2001;90(6):749-784.
59	Carfecillin	C(=O)(Oc1ccccc1)C(C(=O)N[C@@H]2C(=O)N3[C@@H](C(=O)O)C(S[C@@H]32)(C)C)c4ccccc4	99	0.006251	386.304	1.17394	650	J Pharm Sci. 2001;90(6):749-784.
60	Carvedilol	O(c1c2c3c(cccc3)[nH]c2ccc1)CC(O)CNCCOc4c(OC)cccc4	65	0.237988	89.4785	20.3334	50	J Cardiovasc Pharmacol. 1987;10 Suppl 11:S85-88.
61	Cefaclor	C(=O)(C1=C(Cl)CS[C@H]2N1C(=O)[C@H]2NC(=O)[C@@H](c3ccccc3)N)O	90	0.011961	285.095	0.0196727	375	https://reference.medscape.com 24th June, 2019 Accessed.
62	Cefadroxil	C(=O)(C1=C(CS[C@H]2N1C(=O)[C@H]2NC(=O)[C@@H](c3ccc(O)cc3)N)C)O	100	0.062294	261.891	0.47972	500	J Pharm Sci. 2001;90(6):749-784.
63	Cefatrizine	C(=O)(C1=C(CSc2n[nH]nc2)CS[C@H]3N1C(=O)[C@H]3NC(=O)[C@@H](c4ccc(O)cc4)[NH3+])[O-]	76	0.091475	269.669	0.00508669	250	J Pharm Sci. 2001;90(6):749-784.
64	Cefazolin	C(=O)(C1=C(CSc2nnc(s2)C)CS[C@H]3N1C(=O)[C@H]3NC(=O)Cn4nnnc4)O	6	0.000922	526.015	0.00595065	1000	https://pins.japic.or.jp/pdf/newPINS/00063069.pdf 24th June, 2019 Accessed.	*
65	Cefcanel daloxate	C(=O)(OCC1=C(OC(=O)O1)C)C2=C(CSc3nnc(s3)C)CS[C@H]4N2C(=O)[C@H]4NC(=O)[C@H](OC(=O)[C@H](N)C)c5ccccc5	42	0.835292	164.795	6.56432	300	Journal of Antimicrobial Chemotherapy. 1994;33(2):281-288.
66	Cefetamet pivoxil	C(/C(=N\OC)/c1nc(sc1)N)(=O)N[C@@H]2C(=O)N3C(C(=O)OCOC(C(C)(C)C)=O)=C(CS[C@@H]32)C	52	13.2681	56.6328	24.0463	1000	Antimicrob Agents Chemother. 1988;32(4):573-9.
67	Cefixime	C(/C(=N\OCC(=O)O)/c1nc(sc1)N)(=O)N[C@@H]2C(=O)N3C(C(=O)O)=C(C=C)CS[C@@H]32	30	0.000604	429.98	0.485723	300	J Clin Pharmacol. 1988;28(8):700-706.
68	Cefotiam	C(=O)(C1=C(CSc2nnnn2CCN(C)C)CS[C@H]3N1C(=O)[C@H]3NC(=O)Cc4nc(sc4)N)O	3.1	7.92683	31.4061	0.00139569	400	Eur J Clin Pharmacol. 1990;39(1):33-36.
69	Cefpodoxime pivoxil	C(/C(=N\OC)/c1nc(sc1)N)(=O)N[C@@H]2C(=O)N3C(C(=O)O)=C(COC)CS[C@@H]32	50	0.45304	218.735	0.467022	200	Int J Oral Med Sci. 2015;14(2):48-53.
70	Ceftibuten	C(/C(/c1nc(sc1)N)=C\CC(=O)O)(=O)N[C@@H]2C(=O)N3C(C(=O)O)=CCS[C@@H]32	70.5	0.001137	380.58	0.582084	400	https://www.rxlist.com 28th June, 2019 Accessed.
71	Ceftizoxime	C(/C(=N\OC)/c1nc(sc1)N)(=O)N[C@@H]2C(=O)N3C(C(=O)O)=CCS[C@@H]32	72	0.003644	354.677	0.858827	500	J Pharm Sci. 2001;90(6):749-784.
72	Ceftriaxone	C(/C(=N\OC)/c1nc(sc1)N)(=O)N[C@@H]2C(=O)N3C(C(=O)O)=C(CSC4=NC(=O)C(=O)NN4C)CS[C@@H]32	1	0.105872	383.976	0.650217	1000	https://www.info.pmda.go.jp 28th June, 2019 Accessed.	*
73	Cefuroxime	C(/C(=N\OC)/c1occc1)(=O)N[C@@H]2C(=O)N3C(C(=O)O)=C(COC(=O)N)CS[C@@H]32	5	0.000255	762.661	0.548986	1000	Biopharm Drug Dispos. 1987;8(6):519-26.
74	Cephalexin	C(=O)(C1=C(CS[C@H]2N1C(=O)[C@H]2NC(=O)[C@@H](c3ccccc3)N)C)O	90	0.015836	273.751	0.599706	500	https://reference.medscape.com/drug 29th May, 2023 Accessed.
75	Cephaloridine	C(=O)(C1=C(C[n+]2ccccc2)CS[C@H]3N1C(=O)[C@H]3NC(=O)Cc4sccc4)[O-]	2.5	11.9423	82.7772	0.0424006	2000	https://www.medindia.net/doctors/drug_information/cephaloridine.htm 28th June, 2019 Accessed.	*
76	Cephalothin	C(=O)(C1=C(COC(=O)C)CS[C@H]2N1C(=O)[C@H]2NC(=O)Cc3sccc3)O	2.5	0.001604	428.756	1.26123	1000	http://www.antibiotic-books.jp/drugs 28th June, 2019 Accessed.	*
77	Cephradine	C(=O)(C1=C(CS[C@H]2N1C(=O)[C@H]2NC(=O)[C@@H](C3=CCC=CC3)N)C)O	94	0.016021	275.042	0.58155	500	https://www.drugs.com 28th June, 2019 Accessed.
78	Cerivastatin	C(=O)(O)C[C@H](O)C[C@@H](/C=C/c1c(c(c(nc1C(C)C)C(C)C)COC)-c2ccc(F)cc2)O	100	0.774891	157.846	20.4277	400	Clin Pharmacokinet. 2000;39(2):99-116.
79	Ceronapril	C(=O)(N1[C@H](C(=O)O)CCC1)[C@@H](OP(=O)(O)CCCCc2ccccc2)CCCCN	76	0.001585	348.661	0.00747456	100	Ther Drug Monit. 1992;14(3):200-219.
80	Cetirizine	C(=O)(O)COCCN1CCN(C(c2ccc(Cl)cc2)c3ccccc3)CC1	100	0.025028	108.879	0.607179	7.5	https://www.drugs.com 28th June, 2019 Accessed.
81	Chlorambucil	C(=O)(O)CCCc1ccc(N(CCCl)CCCl)cc1	100	0.061889	91.8868	22.3737	10	https://www.webmd.com/drugs 28th June, 2019 Accessed.
82	Chloramphenicol	C(=O)(C(Cl)Cl)N[C@@H]([C@@H](c1ccc([N+](=O)[O-])cc1)O)CO	90	0.952344	243.369	13.8786	250	J Pharm Sci. 2001;90(6):749-784.
83	Chlordiazepoxide	N(=C1/N=C2C(=C(c3ccccc3)N(O)C/1)C=C(Cl)C=C2)/C	100	3.90758	2.29175	6.77306	40	https://www.info.pmda.go.jp 28th June, 2019 Accessed.
84	Chloroquine	N(CCCC(Nc1c2c(ncc1)cc(Cl)cc2)C)(CC)CC	100	0.494154	148.23	26.2433	500	https://www.mayoclinic.org/drugs-supplements 28th June, 2019 Accessed.
85	Chlorothiazide	O=S(=O)(c1c(Cl)cc2c(S(=O)(=O)N=CN2)c1)N	56	2.80521	51.5791	0.86008	150	J Pharm Sci. 2001;90(6):749-784.
86	Chlorpheniramine	N(CCC(c1ncccc1)c2ccc(Cl)cc2)(C)C	94	8.19e-05	307.838	10.2495	8	Eur J Clin Pharmacol. 1982;22(4):359-365.
87	Chlorpromazine	N(CCCN1c2c(Sc3c1cccc3)ccc(Cl)c2)(C)C	100	0.121967	112.93	22.3917	58.3	Eur J Clin Pharmacol. 1993;45(6):563-569.
88	Chlorpropamide	C(=O)(NS(=O)(=O)c1ccc(Cl)cc1)NCCC	100	5.89463	0.813703	2.93911	250	Br J Clin Pharmacol. 1979;7(1):101-105.
89	Chlortetracycline	C(=O)(C1C(=O)[C@H](N(C)C)[C@@H]2[C@@](C(=O)C3=C(c4c(c(Cl)ccc4O)[C@](O)([C@@H]3C2)C)O)(C=1O)O)N	60	0.652766	140.579	0.0272562	375	https://www.inchem.org 28th June, 2019 Accessed.
90	Chlorthalidone	O=S(=O)(c1c(Cl)ccc(C2(c3c(C(=O)N2)cccc3)O)c1)N	82	1.57744	16.9922	0.547839	50	Eur J Clin Pharmacol. 1979;15(1):35-50.
91	Cibenzoline	c1(C2(c3ccccc3)C(C4=NCCN4)C2)ccccc1	100	0.002085	194.215	9.1557	80	J Clin Pharmacol. 1991;31(1):38-44.
92	Cicaprost	C(#C[C@H]1[C@H](O)C[C@H]2[C@@H]1C/C(=C/COCC(=O)O)/C2)[C@H]([C@H](CC#CCC)C)O	100	1.55e-07	331.127	0.478327	0.008	J Pharm Sci. 2001;90(6):749-784.
93	Cidofovir	O=P(O)(O)CO[C@@H](CN1C(=O)N=C(C=C1)N)CO	3	2.79e-05	3707.46	0.4061	600	J Pharm Sci. 2001;90(6):749-784.
94	Cilazapril	C(=O)(OCC)[C@H](CCc1ccccc1)[NH2+][C@@H]2C(=O)N3N(CCC[C@H]3C(=O)[O-])CCC2	90	0.000122	325.621	0.0201174	2.5	Br J Clin Pharmacol. 1989;27(S2):181S-188S.
95	Cilazaprilate	C(=O)([C@@H](N[C@@H]1C(=O)N2N(CCC[C@H]2C(=O)O)CCC1)CCc3ccccc3)O	19	0.002507	186.615	0.119569	2.5	Br J Clin Pharmacol. 1989;27(S2):181S-188S.	**
96	Cilomilast	C(#N)C1(c2cc(OC3CCCC3)c(OC)cc2)CCC(C(=O)O)CC1	100	0.099618	73.1205	19.3094	15	J Human Pharmcol and Drug Therapy. 2012;21(6).
97	Cimetidine	C(#N)N/C(=N\C)/NCCSCc1c([nH]cn1)C	68	0.10537	516.765	1.62427	200	J Pharm Sci. 2001;90(6):749-784.
98	Ciprofloxacin	C(=O)(C1C(=O)c2c(N(C=1)C3CC3)cc(c(F)c2)N4CCNCC4)O	63	2.03443	2.24565	0.0104897	200	J Pharm Sci. 2001;90(6):749-784.
99	Cisapride	C(=O)(c1c(OC)cc(c(Cl)c1)N)NC2C(OC)CN(CCCOc3ccc(F)cc3)CC2	100	0.038025	121.315	18.4326	12.5	J Pharm Sci. 2001;90(6):749-784.
100	Citalopram	C(#N)c1cc2c(C(c3ccc(F)cc3)(OC2)CCCN(C)C)cc1	100	0.005021	168.972	13.035	20	Eur J Clin Pharmacol. 1998;54(3):237-242.
101	Clarithromycin	N([C@@H]1[C@@H](O)[C@H](O[C@H]2[C@](OC)(C[C@H](C(=O)[C@@H]([C@H]([C@](O)([C@H](OC(=O)[C@@H]([C@@H](O[C@@H]3O[C@H]([C@@H]([C@](OC)(C3)C)O)C)[C@@H]2C)C)CC)C)O)C)C)C)O[C@@H](C1)C)(C)C	89	0.021708	450.238	13.8283	250	Antimicrob Agents Chemother. 1992;36(5):1147-1150.
102	Clavulanic acid	C(=O)(O)[C@H]1/C(/O[C@H]2N1C(=O)C2)=C/CO	75	6.16e-07	39711.3	0.728201	125	https://reference.medscape.com 10th July, 2019 Accessed.
103	Clinafloxacin	C(=O)(C1C(=O)c2c(c(Cl)c(c(F)c2)N3CC(CC3)[NH3+])N(C=1)C4CC4)[O-]	100	9.596	0.880049	0.00550268	400	Antimicrob Agents Chemother. 2001;45(9):2529-2535.
104	Clindamycin	C(=O)(N[C@H]([C@@H](Cl)C)[C@H]1O[C@H](SC)[C@H](O)[C@@H](O)[C@H]1O)[C@H]2N(C[C@H](CCC)C2)C	100	0.053808	1053.93	7.44598	600	Antimicrob Agents Chemother. 1993;37(5):1137-1143.
105	Clofibrate	C(C(Oc1ccc(Cl)cc1)(C)C)(=O)OCC	97	278.503	5.68289	50.0125	1500	https://www.mayoclinic.org/drugs-supplements 10th July, 2019 Accessed.
106	Clonazepam	O=C1Nc2c(C(c3c(Cl)cccc3)=NC1)cc([N+](=O)[O-])cc2	98	0.077439	1.16175	4.77903	2	Eur Neurol. 2003;49(3)173-177.
107	Clonidine	Clc1c(c(Cl)ccc1)NC2=NCCN2	95	9.4e-05	203.95	3.2487	0.3	J Pharm Sci. 2001;90(6):749-784.
108	Cloxacillin	C(=O)(c1c(-c2c(Cl)cccc2)noc1C)N[C@@H]3C(=O)N4[C@@H](C(=O)O)C(S[C@@H]43)(C)C	49	0.009569	349.511	0.785628	500	https://www.drugs.com 10th July, 2019 Accessed.
109	Clozapine	Clc1cc2c(N=C3C(=C(N4CCN(CC4)C)N2)C=CC=C3)cc1	55	0.042136	184.554	20.5211	50	Drug Metab Dispos. 1997;25(5):603-609.
110	Codeine	O(c1c2c3c(cc1)C[C@H]4N(CC[C@@]35[C@@H](O2)[C@@H](O)C=C[C@H]54)C)C	95	0.003823	457.148	1.0272	60	J Pharm Sci. 2001;90(6):749-784.
111	Conivaptan	C(=O)(c1ccc(NC(=O)c2c(-c3ccccc3)cccc2)cc1)N4c5c(-c6c([nH]c(n6)C)CC4)cccc5	100	115.248	0.0120497	5.44711	20	https://www.accessdata.fda.gov/drugsatfda_docs/label/2012/021697s003lbl.pdf 10th July, 2019 Accessed.	*
112	Corticosterone	C(=O)([C@@H]1[C@@]2([C@H]([C@H]3[C@@H]([C@@]4(C(=CC(=O)CC4)CC3)C)[C@@H](O)C2)CC1)C)CO	100	0.15658	15.3154	16.1264	3.7	https://www.mayoclinic.org/drugs-supplements 10th July, 2019 Accessed.
113	Cotinine	O=C1N([C@H](c2cnccc2)CC1)C	90	0.000806	12631.3	2.07279	11.7	Eur J Clin Pharmacol. 1990;38(3):281-287.
114	Creatinine	O=C1N=C(N(C1)C)N	80	0.288223	9003.93	1.13054	2500	J Clin Invest. 1938;17(1):31-40.
115	Cromolyn sodium	C(=O)(C1Oc2c(C(=O)C=1)c(OCC(O)COc3c4C(=O)C=C(C(=O)[O-])Oc4ccc3)ccc2)[O-]	0.5	0.029641	318.169	0.52361	200	https://reference.medscape.com 10th July, 2019 Accessed.
116	Cyclacillin	C(=O)(C1(N)CCCCC1)N[C@@H]2C(=O)N3[C@@H](C(=O)O)C(S[C@@H]32)(C)C	95	0.077979	263.059	0.596905	1500	Curr Med Res and Opi. 1973;1(6):362-368.
117	Cyclophosphamide	N(P1(=O)OCCCN1)(CCCl)CCCl	90	0.178149	1720.01	9.82113	300	Br J Clin Pharmacol. 1979;8:209-217.
118	Cycloserine	C1(=NOC[C@H]1[NH3+])[O-]	73	0.016342	2674.95	4.29912	250	J Pharm Sci. 2001;90(6):749-784.
119	Cyclosporine	O=C1N([C@H](C(=O)N[C@@H](C(=O)N(CC(=O)N([C@H](C(=O)N[C@H](C(=O)N([C@@H](C(=O)N[C@H](C(=O)N[C@H](C(=O)N([C@H](C(=O)N([C@H](C(=O)N([C@@H]1C(C)C)C)CC(C)C)C)CC(C)C)C)C)C)CC(C)C)C)C(C)C)CC(C)C)C)C)CC)[C@@H]([C@@H](C/C=C/C)C)O)C	86	25.4136	8.43334	15.5747	420	Eur J Clin Pharmacol. 1988;34(5):451-460.
120	Cymarin	O=C1OCC(=C1)[C@@H]2[C@@]3([C@@](O)([C@H]4[C@@H]([C@@]5([C@@](O)(C[C@@H](O[C@@H]6O[C@@H]([C@@H](O)[C@@H](OC)C6)C)CC5)CC4)C=O)CC3)CC2)C	47	0.101516	6.46266	1.99556	3	J Pharm Sci. 2001;90(6):749-784.
121	Cyproterone acetate	C(=O)(O[C@@]1(C(=O)C)[C@@]2([C@H]([C@@H]3C=C(Cl)C4[C@]([C@@H]5[C@H](C(=O)C=4)C5)([C@H]3CC2)C)CC1)C)C	100	114.256	0.215919	5.95133	300	https://www.medicines.org.uk/emc 10th July, 2019 Accessed.
122	Cytarabine	O=C1N=C(C=CN1[C@@H]2O[C@@H]([C@@H](O)[C@@H]2O)CO)N	20	0.027661	3818.35	0.143914	200	https://www.info.pmda.go.jp 10th July, 2019 Accessed.	**
123	Dapsone	O=S(=O)(c1ccc(cc1)N)c2ccc(cc2)N	100	1.46961	28.7353	4.87287	100	Int J Clin Pharmacol Ther Toxicol. 1987;25(7):396-400.
124	Demeclocycline	C(=C1C(=O)[C@]2(C(=O)C3=C(c4c(c(Cl)ccc4O)[C@@H](O)[C@H]3C[C@H]2[C@@H](C1=O)[NH+](C)C)[O-])O)([O-])N	66	0.149026	79.1501	0.215689	175	https://www.info.pmda.go.jp/go 10th July, 2019 Accessed.
125	Desferrioxamine	C(N(O)CCCCCNC(=O)CCC(N(O)CCCCCN)=O)(=O)CCC(=O)NCCCCCN(C(=O)C)O	2	0.034575	309.579	0.601828	875	Dtsch Med Wochenschr. 1967;92(19):892-894.
126	Desipramine	c12c(cccc1)CCc3c(N2CCCNC)cccc3	100	0.000722	162.458	5.25415	50	J Pharm Sci. 2001;90(6):749-784.
127	Dexamethasone	C(=O)([C@@]1([C@@]2([C@H]([C@H]3[C@@](F)([C@@]4(C(=CC(=O)C=C4)CC3)C)[C@@H](O)C2)C[C@H]1C)C)O)CO	90	0.048888	10.4265	5.81495	1.5	J Pharm Sci. 2001;90(6):749-784.
128	Dexloxiglumide	C(N(CCCOC)CCCCC)(=O)[C@H](NC(=O)c1cc(Cl)c(Cl)cc1)CCC(=O)O	95	0.058871	307.308	20.3215	200	Xenobiotica. 2003;33(6):625-641.
129	Diazepam	O=C1N(c2c(C(c3ccccc3)=NC1)cc(Cl)cc2)C	100	0.755967	3.77227	7.70721	15	J Pharm Sci. 2001;90(6):749-784.
130	Diazoxide	O=S1(=O)c2c(ccc(Cl)c2)NC(=N1)C	91	12.5191	28.4613	18.6084	330	https://www.info.pmda.go.jp 10th July, 2019 Accessed.
131	Diclofenac	C(=O)(O)Cc1c(Nc2c(Cl)cccc2Cl)cccc1	100	0.054582	155.933	22.2952	50	J Pharm Sci. 2001;90(6):749-784.
132	Dicloxacillin	C(=O)(c1c(-c2c(Cl)cccc2Cl)noc1C)N[C@@H]3C(=O)N4[C@@H](C(=O)O)C(S[C@@H]43)(C)C	55	0.015327	353.881	3.87721	312.5	https://pdr.net/drug-summary 12th July, 2019 Accessed.
133	Didanosine	O=C1c2c(n(cn2)[C@@H]3O[C@H](CO)CC3)NC=N1	50	0.402668	444.869	0.733513	330	Clin Pharmacol Ther. 1991;49(5):523-535.
134	Digoxin	O=C1OCC(=C1)[C@@H]2[C@@]3([C@@](O)([C@H]4[C@@H]([C@@]5([C@@H](C[C@@H](O[C@@H]6O[C@@H]([C@@H](O[C@@H]7O[C@@H]([C@@H](O[C@@H]8O[C@@H]([C@@H](O)[C@@H](O)C8)C)[C@@H](O)C7)C)[C@@H](O)C6)C)CC5)CC4)C)C[C@H]3O)CC2)C	81	0.107118	4.49752	0.227852	1.2	J Pharm Sci. 2001;90(6):749-784.
135	Dihydrocodeine	O(c1c2c3c(cc1)C[C@H]4N(CC[C@@]35[C@@H](O2)[C@@H](O)CC[C@H]54)C)C	89	0.001477	359.991	1.31257	60	J Pharm Sci. 2001;90(6):749-784.
136	Diltiazem	C(=O)(O[C@H]1C(=O)N(c2c(S[C@H]1c3ccc(OC)cc3)cccc2)CCN(C)C)C	90	0.030052	306.831	18.9143	120	Arzneimittelforschung. 1983;33(7):972-977.
137	Diprophylline	O=C1c2c(ncn2CC(O)CO)N(C(=O)N1C)C	95	0.055821	5122.89	0.208778	400	Pharmaceutisch weekblad. 1981;3(1):1320-1325.
138	Disopyramide	C(C(c1ncccc1)(c2ccccc2)CCN(C(C)C)C(C)C)(=O)N	83	0.012891	447.406	7.65903	300	https://dailymed.nlm.nih.gov/dailymed/fda 12th July, 2019 Accessed.
139	Distigminebromide	C(N(CCCCCCN(C(=O)Oc1c[n+](ccc1)C)C)C)(=O)Oc2c[n+](ccc2)C	8	0.001424	1088.09	9.94578	5	Jpn. J. Drug Inform. 2016;18(2):95-105.
140	Disulfiram	C(N(CC)CC)(=S)SSC(N(CC)CC)=S	97	11.0678	1.05362	3.13505	250	J Pharm Sci. 2001;90(6):749-784.
141	Dofetilide	N(CCOc1ccc(NS(=O)(=O)C)cc1)(CCc2ccc(NS(=O)(=O)C)cc2)C	96	0.007462	121.54	16.3796	1.7	Br J Clin Pharmacol. 2000;50(3):247-253.
142	Domperidone	O=C1N(c2c(cc(Cl)cc2)N1)C3CCN(CCCN4C(=O)Nc5c4cccc5)CC3	93	0.334572	21.225	13.5363	10	Eur J Drug Metab Pharmacokinet. 1981;6(1):61-70.
143	Doxapram	O=C1C(c2ccccc2)(c3ccccc3)C(CCN4CCOCC4)CN1CC	100	2.82308	75.4584	22.8759	300	Br J Clin Pharmacol. 1978;7:81-87.
144	Doxifluridine	O=C1C(F)=CN(C(=O)N1)[C@@H]2O[C@@H]([C@@H](O)[C@H]2O)C	90	0.282579	4680.09	0.330564	1296	Br J Clin Phramacol. 1999;47(4):351-356.
145	Doxorubicin	C(=O)([C@]1(O)Cc2c(c3C(=O)c4c(C(=O)c3c(c2[C@@H](O[C@@H]5O[C@H]([C@@H](O)[C@@H](N)C5)C)C1)O)c(OC)ccc4)O)CO	12	0.066278	185.305	0.660213	55	J Pharm Sci. 2001;90(6):749-784.
146	Doxycycline	C(=O)(C1C(=O)[C@@H](N(C)C)[C@H]2[C@](C(=O)C3=C(c4c(O)cccc4[C@@H]([C@H]3[C@@H]2O)C)O)(C=1O)O)N	100	0.903721	76.1329	0.0231688	500	British Medical Journal. 1976;10.
147	Drotaverine	O(c1c(OCC)cc2c(/C(=C/c3cc(OCC)c(OCC)cc3)/NCC2)c1)CC	100	45.3849	0.122998	5.50348	80	Eur J Drug Metab Pharmacokinet. 1996;21(3):217-221.
148	Eflornithine	C(C(C(F)F)(CCCN)N)(=O)O	55	0.103023	113.904	0.00693327	900	J Pharm Sci. 2001;90(6):749-784.
149	Enalapril	C(=O)(OCC)[C@H](CCc1ccccc1)[NH2+][C@H](C(=O)N2[C@H](C(=O)[O-])CCC2)C	66	0.000394	294.281	0.0182778	10	https://www.nhs.uk/medicines/enalapril/how-and-when-to-take-enalapril 29th May, 2023 Accessed.
150	Enalaprilat	C(=O)(N1[C@H](C(=O)O)CCC1)[C@@H](N[C@H](C(=O)O)CCc2ccccc2)C	10	7.72e-06	418.336	0.0241623	10	https://reference.medscape.com 12th July, 2019 Accessed.
151	Encainide	C(=O)(c1ccc(OC)cc1)Nc2c(cccc2)CCC3N(CCCC3)C	95	0.000475	204.001	7.00422	25	Cardiovasc Drugs Ther. 1991;5(4):733-739.
152	Entacapone	C(/C(/C(N(CC)CC)=O)=C\c1cc(c(c(O)c1)O)[N+](=O)[O-])#N	96	0.03055	234.953	2.82266	100	Eur J Clin Pharmacol. 2001;56(11):821-826.
153	Epristeride	C(=O)(C1=CC2[C@@]([C@@H]3[C@H]([C@H]4[C@@]([C@@H](C(=O)NC(C)(C)C)CC4)(CC3)C)CC=2)(CC1)C)O	93	0.114979	29.5032	20.2986	5	Biopharm Drug Dispos. 1996;17(3):249-258.
154	Eprosartan	C(/C(=C/c1n(c(nc1)CCCC)Cc2ccc(C(=O)O)cc2)/Cc3sccc3)(=O)O	15	0.113529	260.278	1.12365	300	Biopharm Drug Dispos. 1998;19(6):351-356.
155	Erythritol	[C@@H]([C@@H](O)CO)(O)CO	90	0.0327	134499	0.201434	20000	Regul Toxicol Pharmacol. 1996;24(2 Pt 2):S303-S308.
156	Erythromycin	N([C@@H]1[C@@H](O)[C@H](O[C@H]2[C@](O)(C[C@H](C(=O)[C@@H]([C@H]([C@](O)([C@H](OC(=O)[C@@H]([C@@H](O[C@@H]3O[C@H]([C@@H]([C@](OC)(C3)C)O)C)[C@@H]2C)C)CC)C)O)C)C)C)O[C@@H](C1)C)(C)C	50	0.006256	494.867	4.27129	200	https://www.info.pmda.go.jp/go 10th July, 2019 Accessed.
157	Ethambutol	[C@@H](NCCN[C@H](CO)CC)(CO)CC	80	0.000193	14349.1	1.1467	1200	J Pharm Sci. 2001;90(6):749-784.
158	Ethinylestradiol	C([C@]1([C@@]2([C@H]([C@H]3[C@@H](c4c(cc(O)cc4)CC3)CC2)CC1)C)O)#C	100	23.48	0.617521	13.5646	30	J Pharm Sci. 2001;90(6):749-784.
159	Ethionamide	C(=S)(c1cc(ncc1)CC)N	80	1.24153	166.886	4.20231	250	https://reference.medscape.com 10th July, 2019 Accessed.
160	Etilefrine	c1(C(O)CNCC)cc(O)ccc1	100	2.1e-06	4653.26	1.47984	2.5	https://www.info.pmda.go.jp/go 10th July, 2019 Accessed.
161	Etoposide	O=C1OC[C@@H]2[C@H](O[C@@H]3O[C@H]4[C@@H](O[C@@H](OC4)C)[C@H](O)[C@H]3O)c5c(cc6c(OCO6)c5)[C@@H](c7cc(OC)c(c(OC)c7)O)[C@@H]12	52	5.94205	41.5381	5.26183	350	J Pharm Sci. 2001;90(6):749-784.
162	Famciclovir	C(=O)(OCC(COC(=O)C)CCn1c2c(nc1)cnc(n2)N)C	77	0.502106	577.81	6.78558	312.5	J Pharm Sci. 2001;90(6):749-784.
163	Famotidine	C(=NS(=O)(=O)N)(CCSCc1nc(N=C(N)N)sc1)N	38	0.108216	55.0904	0.167167	20	https://www.info.pmda.go.jp/go 10th July, 2019 Accessed.
164	Faropenem	C(=O)(C1=C(S[C@H]2N1C(=O)[C@@H]2[C@H](O)C)[C@@H]3OCCC3)O	20	2.24e-05	3767.29	0.818143	75	https://www.info.pmda.go.jp/go 10th July, 2019 Accessed.
165	Felbamate	C(=O)(OCC(c1ccccc1)COC(=O)N)N	90	0.612851	1127.58	4.03964	650	J Pharm Sci. 2001;90(6):749-784.
166	Felodipine	C(=O)(OCC)C1=C(NC(=C(C(=O)OC)C1c2c(Cl)c(Cl)ccc2)C)C	88	36.3631	0.594852	19.471	27.5	J Pharm Sci. 2001;90(6):749-784.
167	Fenclofenac	C(=O)(O)Cc1c(Oc2c(Cl)cc(Cl)cc2)cccc1	100	12.5741	24.0385	25.9283	400	J Pharm Sci. 2001;90(6):749-784.
168	Fenoterol	c1(C(O)CNC(Cc2ccc(O)cc2)C)cc(O)cc(O)c1	60	0.000285	581.813	1.18535	12.5	J Pharm Sci. 2001;90(6):749-784.
169	Fenspiride	O=C1OC2(CN1)CCN(CCc3ccccc3)CC2	100	0.001213	229.811	1.00689	80	Eur J Clin Pharmacol. 1993;45(2):169-172.
170	Fexofenadine	C(C(c1ccc(C(O)CCCN2CCC(C(c3ccccc3)(c4ccccc4)O)CC2)cc1)(C)C)(=O)O	34	3.38986	2.17944	0.107032	60	https://www.info.pmda.go.jp/go 10th July, 2019 Accessed.
171	Finasteride	C(=O)(NC(C)(C)C)[C@@H]1[C@@]2([C@H]([C@H]3[C@@H]([C@]4(C=CC(=O)N[C@@H]4CC3)C)CC2)CC1)C	80	7.19489	1.10497	8.19948	38.1	Drug Metab Dispos. 1992;20(2):148-155.
172	Flecainide	C(=O)(c1c(OCC(F)(F)F)ccc(OCC(F)(F)F)c1)NCC2NCCCC2	81	0.002672	276.1	19.6121	100	https://reference.medscape.com 10th July, 2019 Accessed.
173	Fleroxacin	C(=O)(C1C(=O)c2c(c(F)c(c(F)c2)N3CCN(CC3)C)N(C=1)CCF)O	100	5.2099	3.80002	0.0112549	466.7	Antimicrob Agents Chemother. 1987;31(12):1909-1914.
174	Fluconazole	C(c1c(F)cc(F)cc1)(O)(Cn2ncnc2)Cn3ncnc3	95	0.085727	1106.7	5.57326	100	J Pharm Sci. 2001;90(6):749-784.
175	Flucytosine	O=C1N=CC(F)=C(N1)N	88	7.53267	703.077	1.14002	4500	https://www.info.pmda.go.jp/go 10th July, 2019 Accessed.
176	Fludarabine	O=P(OC[C@H]1O[C@@H](n2c3c(c(nc(F)n3)N)nc2)[C@@H](O)[C@@H]1O)(O)O	75	5.64e-06	831.39	0.452838	50	https://www.e-mr.sanofi.co.jp/dam/jcr:31710078-f88d-47c9-9795-37fb624687da/fdr_summary10_2020_01.pdf 29th May, 2023 Accessed.
177	Flumazenil	C(=O)(OCC)c1c2n(-c3c(C(=O)N(C2)C)cc(F)cc3)cn1	95	1.59311	87.1218	15.3099	200	J Pharm Sci. 2001;90(6):749-784.
178	Flupirtine	C(=O)(OCC)Nc1c(nc(NCc2ccc(F)cc2)cc1)N	100	10.6289	12.323	13.3424	300	https://clinicaltrials.gov 12th July, 2019 Accessed.
179	Fluvastatin	C(=O)(O)C[C@H](O)C[C@@H](/C=C/c1c(c2c(n1C(C)C)cccc2)-c3ccc(F)cc3)O	100	0.002359	257.479	18.9674	6	J Pharm Sci. 2001;90(6):749-784.
180	Folinic acid	C(=O)(c1ccc(NCC2N(C3C(=O)N=C(NC=3NC2)N)C=O)cc1)N[C@H](C(=O)O)CCC(=O)O	36	0.002128	343.619	0.46498	25	Br J Clin Phramacol. 1989;28(3):289-295.
181	Foscarnet	C(=O)(P(=O)(O)O)O	17	0.000343	86734	0.402862	160000	J Pharm Sci. 2001;90(6):749-784.
182	Fosfomycin	O=P(O)(O)[C@H]1O[C@H]1C	31	2.16e-06	147494	0.339047	1800	J Pharm Sci. 2001;90(6):749-784.
183	Fosinopril	C(=O)(OC(OP(=O)(CC(=O)N1[C@H](C(=O)O)C[C@@H](C2CCCCC2)C1)CCCCc3ccccc3)C(C)C)CC	36	0.009923	218.265	17.9107	10	J Pharm Sci. 2001;90(6):749-784.
184	Fosmidomycin	N(C=O)(O)CCCP(=O)(O)O	30	1.55e-06	51840.1	0.482951	500	J Pharm Sci. 2001;90(6):749-784.
185	Frovatriptan	C(=O)(c1cc2c3c([nH]c2cc1)CC[C@@H](NC)C3)N	40	0.000319	204.741	0.754204	50.5	Headache. 2002;42 Suppl 2:S54-S62.
186	Furosemide	C(=O)(c1c(NCc2occc2)cc(Cl)c(S(=O)(=O)N)c1)O	61	0.008676	231.837	1.15423	40	J Pharm Sci. 2001;90(6):749-784.
187	Gabapentin	C(=O)(O)CC1(CN)CCCCC1	60	0.131961	109.74	0.0946673	500	J Pharm Sci. 2001;90(6):749-784.
188	Gallopamil	C(C(c1cc(OC)c(OC)c(OC)c1)(C(C)C)CCCN(CCc2cc(OC)c(OC)cc2)C)#N	100	0.0098	220.982	8.08107	25	J Pharm Sci. 2001;90(6):749-784.
189	Ganciclovir	O=C1c2c(n(cn2)COC(CO)CO)NC(=N1)N	5.6	0.060233	275.256	0.0573859	75	J Pharm Sci. 2001;90(6):749-784.
190	Gatifloxacin	C(=O)(C1C(=O)c2c(c(OC)c(c(F)c2)N3CC([NH2+]CC3)C)N(C=1)C4CC4)[O-]	96	1.278	1.93543	1.99951	100	https://www.kyorin-pharm.co.jp/news/docs/020611.pdf 12th July, 2019 Accessed.
191	Genaconazole	[C@@](c1c(F)cc(F)cc1)([C@H](S(=O)(=O)C)C)(O)Cn2ncnc2	100	0.590647	155.013	7.84514	100	Antimicrob Agents Chemother. 1994;38(12):2758-2762.
192	Gentamicin	O(C1OC(C(NC)C)CCC1N)C2C(O)C(OC3OCC(O)(C(NC)C3O)C)C(N)CC2N	0.03	0.001098	5961.15	0.574744	1020	Pediatr Pharmacol (New York). 1983;3(2):119-123.
193	Ginkgolide A	C([C@H]1[C@@]23[C@]45[C@](C(=O)O[C@@H]4C1)([C@@]6(O)[C@@H](C(=O)O[C@H]6C5)C)O[C@@H]2OC(=O)[C@@H]3O)(C)(C)C	90	0.08892	19.6683	6.36422	2.1	Therapie. 1995;50(2):137-144.
194	Ginkgolide B	C([C@H]1[C@@]23[C@]45[C@](C(=O)O[C@@H]4C1)([C@@]6(O)[C@@H](C(=O)O[C@H]6[C@@H]5O)C)O[C@@H]2OC(=O)[C@@H]3O)(C)(C)C	90	0.037992	45.2385	0.744599	2.1	Therapie. 1995;50(2):137-144.
195	Glibenclamide	C(=O)(c1c(OC)ccc(Cl)c1)NCCc2ccc(S(=O)(=O)NC(=O)NC3CCCCC3)cc2	100	2.06112	1.85024	18.8206	5	The Journal of Clinical Pharmacology and New Drugs. 1973;13(2-3).
196	Gliclazide	C(=O)(NS(=O)(=O)c1ccc(cc1)C)NN2CC3C(C2)CCC3	97	1.00604	42.2675	8.51389	200	https://www.medbroadcast.com 12th July, 2019 Accessed.
197	Glimepiride	C(=O)(N1C(=O)C(=C(C1)C)CC)NCCc2ccc(S(=O)(=O)NC(=O)NC3CCC(CC3)C)cc2	100	0.044159	16.6014	18.7842	1	Drug Metabol Drug Interact. 1994;11(4):331-339.
198	Glipizide	C(=O)(c1ncc(nc1)C)NCCc2ccc(S(=O)(=O)NC(=O)NC3CCCCC3)cc2	100	0.020078	105.973	0.710516	5	The Journal of Clinical Pharmacology and New Drugs. 1973;13(2-3).
199	Glycine	C(=O)([O-])C[NH3+]	100	0.024492	110.8	0.864953	4000	http://webmed.com 12th July, 2019 Accessed.
200	Glycopyrrolate	C(C(c1ccccc1)(O)C2CCCC2)(=O)OC3C[N+](CC3)(C)C	17.5	0.000902	91.5948	0.0173019	1.2	https://www.mayoclinic.org/drugs-supplements 12th July, 2019 Accessed.
201	Granisetron	C(=O)(c1c2c(n(n1)C)cccc2)NC3CC4N(C(C3)CCC4)C	100	4e-05	353.216	2.02511	6	J Pharm Sci. 2001;90(6):749-784.
202	Guanabenz	C(=N/N=C/c1c(Cl)cccc1Cl)(N)N	75	0.14914	67.4449	20.2129	24	J Pharm Sci. 2001;90(6):749-784.
203	Guanfacine	C(N=C(N)N)(=O)Cc1c(Cl)cccc1Cl	100	0.064779	46.2971	13.6594	4	https://www.info.pmda.go.jp/go 12th July, 2019 Accessed.
204	Guanoxan	C(=NCC1Oc2c(OC1)cccc2)(N)N	50	1.57e-07	722.722	1.08966	20	Diagnose und Therapie in der Praxis. Springer-Verlag Berlin · Heidelberg 1973 https://doi.org/10.1007/978-3-642-96150-2
205	Haloperidol	C(=O)(c1ccc(F)cc1)CCCN2CCC(c3ccc(Cl)cc3)(O)CC2	100	0.123347	92.7214	19.2513	30	Clin Pharmacol Ther. 1983;33(4):477-484.
206	HBED	C(=O)(O)CN(Cc1c(O)cccc1)CCN(CC(=O)O)Cc2c(O)cccc2	5	0.066751	292.559	0.0152918	1200	Adv Exp Med Biol. 1994;356:351-359.
207	Hydrochlorothiazide	O=S(=O)(c1c(Cl)cc2c(S(=O)(=O)NCN2)c1)N	67	0.419614	100.379	0.62455	43.8	J Pharm Sci. 2001;90(6):749-784.
208	Hydrocortisone	C(=O)([C@@]1([C@@]2([C@H]([C@H]3[C@@H]([C@@]4(C(=CC(=O)CC4)CC3)C)[C@@H](O)C2)CC1)C)O)CO	91	3.72839	28.132	13.3442	200	J Pharm Sci. 2001;90(6):749-784.
209	Hydroflumethazide	C(F)(F)(F)c1c(S(=O)(=O)N)cc2c(c1)NCNS2(=O)=O	62	0.545313	133.312	0.674571	79.4	Eur J Clin Pharmacol. 1979;16(2):125-131.
210	Hydroxyurea	C(=O)(NO)N	100	0.231198	15424.7	3.40637	2000	Blood. 19981;91(5):1533-1541.
211	Ibuprofen	C(=O)(C(c1ccc(cc1)CC(C)C)C)O	95	0.397671	135.596	24.9312	400	J Pharm Sci. 2001;90(6):749-784.
212	Idarubicin	C(=O)([C@]1(O)Cc2c(c3C(=O)c4c(C(=O)c3c(c2[C@@H](O[C@@H]5O[C@H]([C@@H](O)[C@@H](N)C5)C)C1)O)cccc4)O)C	30	0.0689	124.227	0.890424	24.3	Onkologie. 1991;14(1):31-34.
213	Idazoxan	c12c(OCC(C3=NCCN3)O1)cccc2	95	0.000198	1461.13	1.27278	46.7	Psychopharmacology (Berl). 1992;108(3):313-319.
214	Ifosfamide	O=P1(N(CCCl)CCCO1)NCCCl	100	1.64173	1511.81	12.8244	2430	Arzneimittelforschung. 1986 May;36(5):878-880.
215	Imipenem	C(=O)(C1=C(SCC/N=C/N)C[C@H]2N1C(=O)[C@@H]2[C@H](O)C)O	2.5	0.18074	2191.18	0.412409	500	https://www.info.pmda.go.jp/go 12th July, 2019 Accessed.	*
216	Imipramine	N(CCCN1c2c(cccc2)CCc3c1cccc3)(C)C	100	0.010195	152.073	20.2593	50	J Pharm Sci. 2001;90(6):749-784.
217	Indomethacin	C(=O)(c1ccc(Cl)cc1)n2c3c(c(c2C)CC(=O)O)cc(OC)cc3	100	0.731387	42.5022	21.0163	50	J Pharm Sci. 2001;90(6):749-784.
218	Iothalamate sodium	C(=O)(c1c(I)c(C(=O)NC)c(I)c(c1I)NC(=O)C)[O-]	1.9	0.001765	529.995	0.00211714	800	J Pharm Sci. 2001;90(6):749-784.
219	Iotroxic acid	C(=O)(c1c(I)c(c(I)cc1I)NC(=O)COCCOCCOCC(=O)Nc2c(I)c(C(=O)O)c(I)cc2I)O	5	0.062858	930.191	0.760129	7983	https://www.info.pmda.go.jp/go 12th July, 2019 Accessed.	*
220	Isoniazid	C(=O)(c1ccncc1)NN	80	0.102727	2186.16	0.715105	300	J Pharm Sci. 2001;90(6):749-784.
221	Isosorbide-5-mononitrate	O=[N+](O[C@H]1[C@H]2OC[C@H](O)[C@H]2OC1)[O-]	100	0.001743	7681.98	0.537289	15	Clin Pharmacol Ther. 1984 Oct;36(4):485-492.
222	Isoxicam	C(=O)(C1=C(c2c(S(=O)(=O)N1C)cccc2)O)Nc3noc(c3)C	100	1.40166	69.6884	4.843	200	J Pharm Sci. 2001;90(6):749-784.
223	Isradipine	C(=O)(OC(C)C)C1=C(NC(=C(C(=O)OC)C1c2c3c(non3)ccc2)C)C	92	1.63061	6.66514	20.8659	12.5	J Pharm Sci. 2001;90(6):749-784.
224	Itraconazole	O=C1N(c2ccc(N3CCN(c4ccc(OC[C@@H]5O[C@@](c6c(Cl)cc(Cl)cc6)(OC5)Cn7ncnc7)cc4)CC3)cc2)C=NN1C(CC)C	85	157.896	0.617941	17.2886	150	https://www.info.pmda.go.jp/go 12th July, 2019 Accessed.
225	Kanamycin	O([C@H]1O[C@@H]([C@@H](O)[C@@H]([C@H]1O)N)CO)[C@@H]2[C@@H](O)[C@H](O[C@H]3O[C@@H]([C@@H](O)[C@H](O)[C@H]3O)CN)[C@@H](N)C[C@H]2N	1	0.039773	13162.2	0.285551	4000	J Pharm Sci. 2001;90(6):749-784.
226	Ketanserin	C(=O)(c1ccc(F)cc1)C2CCN(CCN3C(=O)c4c(cccc4)NC3=O)CC2	100	2.56086	9.66465	16.5561	40	Eur J Clin Pharmacol. 1986;31(3):343-350.
227	Ketoprofen	C(=O)(c1cc(C(C(=O)O)C)ccc1)c2ccccc2	92	0.277755	121.374	11.5516	150	Scand J Rheumatol Suppl. 1976;1976(0):45-52.
228	Ketorolac	C(=O)(c1n2c(cc1)C(C(=O)O)CC2)c3ccccc3	100	0.000799	207.476	23.3546	10	J Pharm Sci. 2001;90(6):749-784.
229	k-Strophanthoside	O=C1OCC(=C1)[C@@H]2[C@@]3([C@@](O)([C@H]4[C@@H]([C@@]5([C@@](O)(C[C@@H](O[C@@H]6O[C@@H]([C@@H](O[C@@H]7O[C@@H]([C@@H](O)[C@H](O)[C@H]7O)CO[C@@H]8O[C@@H]([C@@H](O)[C@H](O)[C@H]8O)CO)[C@@H](OC)C6)C)CC5)CC4)C=O)CC3)CC2)C	16	0.080248	30.5562	0.276455	4.8	J Pharm Sci. 2001;90(6):749-784.
230	Labetalol	C(=O)(c1c(O)ccc(C(O)CNC(CCc2ccccc2)C)c1)N	95	0.023091	209.885	5.37558	600	J Pharm Sci. 2001;90(6):749-784.
231	Lactulose	O([C@@H]1O[C@@H]([C@H](O)[C@H](O)[C@H]1O)CO)[C@H]2[C@@H]([C@@](O[C@@H]2CO)(O)CO)O	6	0.305604	14016.6	0.195531	10000	J Pharm Sci. 2001;90(6):749-784.
232	Lamivudine	O=C1N=C(C=CN1[C@H]2O[C@H](SC2)CO)N	4	0.109943	640.442	0.252932	100	J Pharm Sci. 2001;90(6):749-784.
233	Lamotrigine	Clc1c(Cl)cccc1-c2c(nc(nn2)N)N	100	2.83833	5.00979	5.38102	127.5	J Pharm Sci. 2001;90(6):749-784.
234	Lansoprazole	C(F)(F)(F)COc1c(c(ncc1)CS(=O)c2nc3c(cccc3)[nH]2)C	100	0.618659	42.2653	19.5057	30	J Pharm Sci. 2001;90(6):749-784.
235	Letrozole	C(#N)c1ccc(C(c2ccc(C#N)cc2)n3ncnc3)cc1	100	0.39866	6.14427	22.7006	2.5	Biopharm Drug Dispos. 1997;18(9):779-789.
236	Levodopa	C(=O)([C@H](Cc1cc(c(O)cc1)O)N)O	86	0.148623	151.634	0.697647	1400	https://www.info.pmda.go.jp/go 12th July, 2019 Accessed.
237	Levofloxacin	C(=O)(C1C(=O)c2c3c(c(c(F)c2)N4CCN(CC4)C)OC[C@@H](N3C=1)C)O	100	6.37463	8.90858	6.02407	500	J Antimicrob Chemother. 2003 Jan;51(1):101-106.
238	Levomepromazine	N(C[C@H](CN1c2c(Sc3c1cccc3)ccc(OC)c2)C)(C)C	100	0.039172	168.489	21.8988	112.5	https://www.info.pmda.go.jp/go 12th July, 2019 Accessed.
239	Levonorgestrel	C([C@]1([C@@]2([C@H]([C@H]3[C@@H]([C@@H]4C(=CC(=O)CC4)CC3)CC2)CC1)CC)O)#C	100	0.659354	2.13943	22.3467	1.5	https://www.drugs.com 12th July, 2019 Accessed.
240	Levoprotiline	c12c(cccc1)C3c4c(C2(C[C@@H](O)CNC)CC3)cccc4	100	0.002495	184.479	6.65192	75	Biopharm Drug Dispos. 1992;13(2):83-93.
241	Lincomycin	C(=O)(N[C@H]([C@H](O)C)[C@H]1O[C@H](SC)[C@H](O)[C@@H](O)[C@H]1O)[C@H]2N(C[C@H](CCC)C2)C	28	0.007489	4325.2	0.780629	500	https://pharmacypedia.org/drugs-and-supplements 12th July, 2019 Accessed.
242	Linezolid	C(=O)(NC[C@@H]1OC(=O)N(c2cc(F)c(N3CCOCC3)cc2)C1)C	100	2.61296	165.09	11.1904	475	J Antimicrob Chemother. 2003;51(5):1239-1246.
243	Lisinopril	C(=O)(N1[C@H](C(=O)[O-])CCC1)[C@H](CCCC[NH3+])[NH2+][C@H](C(=O)[O-])CCc2ccccc2	28	0.005293	254.832	0.012932	15	J Pharm Sci. 2001;90(6):749-784.
244	Loracarbef	C(=O)(C1=C(Cl)CC[C@H]2N1C(=O)[C@H]2NC(=O)[C@@H](c3ccccc3)[NH3+])[O-]	100	0.177426	1157.81	4.29512	300	J Pharm Sci. 2001;90(6):749-784.
245	Lorazepam	O=C1C(N=C(c2c(Cl)cccc2)c3c(ccc(Cl)c3)N1)O	100	0.027752	2.62031	5.51065	0.8	https://www.info.pmda.go.jp/go 12th July, 2019 Accessed.
246	Lorcainide	C(N(c1ccc(Cl)cc1)C2CCN(C(C)C)CC2)(=O)Cc3ccccc3	100	0.007161	224.866	18.1937	150	Clin Pharmacokinet. 1978 Sep-Oct;3(5):407-418.
247	Lormetazepam	O=C1N(c2c(C(c3c(Cl)cccc3)=NC1O)cc(Cl)cc2)C	100	0.092189	5.15465	8.54576	2	J Pharm Sci. 2001;90(6):749-784.
248	Lornoxicam	C(=O)(C1=C(c2c(S(=O)(=O)N1C)cc(Cl)s2)O)Nc3ncccc3	100	0.131242	22.2089	10.929	4	J Pharm Sci. 2001;90(6):749-784.
249	Losartan	Clc1c(n(c(n1)CCCC)Cc2ccc(-c3c(-c4nn[nH]n4)cccc3)cc2)CO	80	0.029583	212.729	9.95125	37.5	https://www.info.pmda.go.jp/go 13th July, 2019 Accessed.
250	Lovastatin	C(=O)(O[C@@H]1[C@H]2C(C=C[C@@H]([C@@H]2CC[C@H]3OC(=O)C[C@H](O)C3)C)=C[C@@H](C1)C)[C@H](CC)C	31	20.9699	2.39286	20.6293	60	J Pharm Sci. 2001;90(6):749-784.
251	Loxiglumide	C(N(CCCOC)CCCCC)(=O)C(NC(=O)c1cc(Cl)c(Cl)cc1)CCC(=O)O	100	0.088306	306.902	19.5214	300	Arzneimittelforschung. 1988;38(5):716-720.
252	Mannitol	[C@H]([C@@H]([C@H](O)CO)O)([C@H](O)CO)O	48	0.002568	63912.7	0.244099	500	J Pharm Sci. 2001;90(6):749-784.
253	Mebendazole	C(=O)(c1cc2c(nc(NC(=O)OC)[nH]2)cc1)c3ccccc3	100	74.1893	0.278507	5.0385	500	S Afr Med J. 1987;72(10):665-667.
254	Melagatran	C(=O)(N1[C@H](C(=O)NCc2ccc(C(=N)N)cc2)CC1)[C@H](NCC(=O)O)C3CCCCC3	15	0.063827	412.406	0.750264	48	Clin Pharmacokinet. 2006;45(1):77-84.
255	Meloxicam	C(=O)(C1=C(c2c(S(=O)(=O)N1C)cccc2)O)Nc3ncc(s3)C	90	0.261559	61.0072	15.5288	30	J Pharm Sci. 2001;90(6):749-784.
256	Mesna	O=S(=O)([O-])CCS	77	2.92e-08	33420.3	0.899759	1200	Clinical Cnacer Research. 1998;4:2313-2320.
257	Metaproterenol	c1(C(O)CNC(C)C)cc(O)cc(O)c1	44	3.84e-06	3813.83	1.10478	1.6	J Pharm Sci. 2001;90(6):749-784.
258	Metformin	C(N=C(N)N)(N(C)C)=N	52	7.21e-07	4374.07	3.07729	1000	J Pharm Sci. 2001;90(6):749-784.
259	Methadone	C(C(c1ccccc1)(c2ccccc2)CC(N(C)C)C)(=O)CC	100	0.00275	171.689	21.088	10	https://www.info.pmda.go.jp/go 13th July, 2019 Accessed.
260	Methotrexate	C(=O)(c1ccc(N(Cc2nc3c(nc(nc3N)N)nc2)C)cc1)N[C@H](C(=O)O)CCC(=O)O	70	0.082465	284.322	0.636177	303	https://www.medicines.org.uk/emc 24th June, 2019 Accessed.
261	Methyldopa	C([C@](Cc1cc(c(O)cc1)O)(N)C)(=O)O	40	0.428695	654.74	0.433412	250	J Pharm Sci. 2001;90(6):749-784.
262	Methylprednisolone	C(=O)([C@@]1([C@@]2([C@H]([C@H]3[C@@H]([C@@]4(C(=CC(=O)C=C4)[C@H](C3)C)C)[C@@H](O)C2)CC1)C)O)CO	82	0.890362	22.2347	14.0816	36	J Pharm Sci. 2001;90(6):749-784.
263	Metoclopramide	C(=O)(c1c(OC)cc(c(Cl)c1)N)NCCN(CC)CC	100	0.000149	386.169	1.99935	17	Br J Clin Pharmac. 1991;31:185-187.
264	Metolazone	O=S(=O)(c1c(Cl)cc2c(C(=O)N(c3c(cccc3)C)C(N2)C)c1)N	64	0.318435	2.21631	9.56127	2.5	J Pharm Sci. 2001;90(6):749-784.
265	Metoprolol	O(c1ccc(cc1)CCOC)CC(O)CNC(C)C	98	0.00021	1322.22	0.830416	300	J Pharm Sci. 2001;90(6):749-784.
266	Metronidazole	O=[N+](c1n(c(nc1)C)CCO)[O-]	100	0.094687	2162.85	1.64151	250	https://www.info.pmda.go.jp/go 13th July, 2019 Accessed.
267	Mibefradil	C(=O)(O[C@]1([C@H](c2c(cc(F)cc2)CC1)C(C)C)CCN(CCCc3nc4c(cccc4)[nH]3)C)COC	69	28.4229	3.92921	18.0192	165	J Pharm Sci. 2001;90(6):749-784.
268	Midazolam	Fc1c(C2c3c(-n4c(ncc4CN=2)C)ccc(Cl)c3)cccc1	90	5.4459	0.387412	5.77899	23.3	Br J Clin Pharmacol. 1983;16 Suppl 1(Suppl 1):43S-49S.
269	Mifobate	O=P(OC(P(=O)(OC)OC)c1ccc(Cl)cc1)(OC)OC	82	0.720601	613.117	15.8202	500	J Pharm Sci. 2001;90(6):749-784.
270	Miglitol	N1([C@@H]([C@@H](O)[C@H](O)[C@@H](O)C1)CO)CCO	59	0.000387	47531.4	0.135223	50	https://www.info.pmda.go.jp/go 13th July, 2019 Accessed.
271	Milrinone	C(#N)C1C(=O)NC(=C(c2ccncc2)C=1)C	100	0.116981	52.8845	4.6266	5.8	Cardiology. 1995;86(1):34-40.
272	Minocycline	C(=O)(C1C(=O)[C@@H](N(C)C)[C@H]2[C@](C(=O)C3=C(c4c(O)ccc(N(C)C)c4C[C@H]3C2)O)(C=1O)O)N	100	0.418835	57.6859	0.0131404	200	Arzneimittelforschung. 1976;26(4):556-560.
273	Minoxidil	C1(N=C(N2CCCCC2)C=C(N1O)N)=N	98	0.059706	94.428	7.05752	5	https://www.rxlist.com 13th July, 2019 Accessed.
274	Mirtazapine	c12c(cccn1)Cc3c(cccc3)C4N2CCN(C4)C	80	0.08696	97.0898	23.2337	15	https://psycnet.apa.org 13th July, 2019 Accessed.
275	Moclobemide	C(=O)(c1ccc(Cl)cc1)NCCN2CCOCC2	98	0.201384	213.386	17.2283	50	Arzneimittelforschung. 1984;34(1):80-82.
276	Montelukast	C(=O)(O)CC1(CS[C@@H](c2cc(/C=C/c3nc4c(ccc(Cl)c4)cc3)ccc2)CCc5c(C(O)(C)C)cccc5)CC1	80	17.1097	0.302831	13.9048	10	Biopharm Drug Dispos. 1997 Dec;18(9):769-777.
277	Morphine	c12c3c(O)ccc1C[C@H]4N(CC[C@@]25[C@@H](O3)[C@@H](O)C=C[C@H]54)C	85	0.001024	530.24	0.852404	20	J Pharm Sci. 2001;90(6):749-784.
278	Moxifloxacin	C(=O)(C1C(=O)c2c(c(OC)c(c(F)c2)N3C[C@@H]4[C@H](C3)CCCN4)N(C=1)C5CC5)O	90	11.6864	0.881794	3.69095	400	https://www.accessdata.fda.gov/drugsatfda_docs/label/2013/021085s057%2C021277s054lbl.pdf 13th July, 2019 Accessed.
279	Moxonidine	O(c1c(c(Cl)nc(n1)C)NC2=NCCN2)C	99	7.78e-05	426.061	2.62171	0.2	https://www.medicines.org.uk/emc 13th July, 2019 Accessed.
280	Nadolol	C(NCC(O)COc1c2c(ccc1)C[C@@H](O)[C@@H](O)C2)(C)(C)C	35	2.73e-05	1968.53	0.401942	80	J Pharm Sci. 2001;90(6):749-784.
281	Naloxone	O=C1[C@H]2[C@]34c5c(c(O)ccc5C[C@H]([C@]3(O)CC1)N(CC=C)CC4)O2	91	5.75e-05	213.731	10.6505	0.1	J Pharm Sci. 2001;90(6):749-784.
282	Naltrexone	O=C1[C@H]2[C@]34c5c(c(O)ccc5C[C@H]([C@]3(O)CC1)N(CC6CC6)CC4)O2	96	0.03521	184.035	0.55796	50	https://www.mayoclinic.org/drugs-supplements 13th July, 2019 Accessed.
283	Naproxen	C(=O)([C@H](c1cc2c(cc(OC)cc2)cc1)C)O	99	0.252039	139.113	16.7419	250	J Pharm Sci. 2001;90(6):749-784.
284	Naratriptan	O=S(=O)(NC)CCc1cc2c(c[nH]c2cc1)C3CCN(CC3)C	80	7.21e-05	197.811	0.494245	1.8	https://www.accessdata.fda.gov/drugsatfda_docs/label/2012/020763s008s009lbl.pdf 13th July, 2019 Accessed.
285	Nateglinide	C(=O)([C@H](NC(=O)C1CCC(C(C)C)CC1)Cc2ccccc2)O	90	0.056707	196.928	9.35416	120	Drug Metab Dispos. 2001;29(4 Pt 1):415-421.
286	Nedocromil	C(=O)(C1N(c2c(C(=O)C=1)cc3C(=O)C=C(C(=O)O)Oc3c2CCC)CC)O	5	0.009385	268.874	0.124123	80	Pulm Pharmacol. 1990;3(4):190-197.
287	Nefazodone	O=C1N(C(=NN1CCCN2CCN(c3cc(Cl)ccc3)CC2)CC)CCOc4ccccc4	100	2.4694	29.2026	19.764	100	J Pharm Sci. 2001;90(6):749-784.
288	Neomycin	O([C@@H]1O[C@@H]([C@@H](O[C@H]2O[C@H]([C@@H](O)[C@H](O)[C@H]2N)CN)[C@H]1O)CO)[C@H]3[C@H](O[C@H]4O[C@@H]([C@@H](O)[C@H](O)[C@H]4N)CN)[C@@H](N)C[C@H]([C@@H]3O)N	1	0.000745	4512.05	0.287258	2800	J Pharm Sci. 2001;90(6):749-784.
289	Neostigmine	C(N(C)C)(=O)Oc1cc([N+](C)(C)C)ccc1	5	0.008244	687.356	5.08458	30	Clin Pharmacokinet. 1986;11(3):236-249.
290	Netivudine	C(#CC)C1C(=O)NC(=O)N(C=1)[C@@H]2O[C@@H]([C@@H](O)[C@@H]2O)CO	28	0.042984	4556.4	0.316328	200	J Antimicrob Chemother. 1996;37(5):965-974.
291	Nevirapine	O=C1c2c(nccc2)N(c3c(c(ccn3)C)N1)C4CC4	100	0.643881	17.0632	8.166	50	Biopharm Drug Dispos. 1999;20(6):285-291.
292	Nicardipine	C(=O)(OCCN(Cc1ccccc1)C)C2=C(NC(=C(C(=O)OC)C2c3cc([N+](=O)[O-])ccc3)C)C	95	4.25834	2.69793	19.0401	15	https://www.info.pmda.go.jp/go 13th July, 2019 Accessed.
293	Nicotine	c1(cnccc1)[C@H]2N(CCC2)C	100	5.72e-06	21801	2.9621	4	https://www.drugs.com 13th July, 2019 Accessed.
294	Nicotinic acid	C(=O)(c1cnccc1)O	88	3.03e-05	210.531	0.3299	16	https://www.mayoclinic.org/drugs-supplements 13th July, 2019 Accessed.
295	Nifedipine	C(=O)(OC)C1=C(NC(=C(C(=O)OC)C1c2c([N+](=O)[O-])cccc2)C)C	100	1.81383	9.89483	21.5516	20	Clin Pharmacol Ther. 1984;35(6):742-749.
296	Nimodipine	C(=O)(OC(C)C)C1=C(NC(=C(C(=O)OCCOC)C1c2cc([N+](=O)[O-])ccc2)C)C	90	5.62204	4.39553	19.9769	30	Int J Clin Pharmacol Ther. 1996;34(7):293-298.
297	Nisoldipine	C(=O)(OCC(C)C)C1=C(NC(=C(C(=O)OC)C1c2c([N+](=O)[O-])cccc2)C)C	90	5.54025	2.30674	20.5869	15	J Pharm Sci. 2001;90(6):749-784.
298	Nitrazepam	O=C1Nc2c(C(c3ccccc3)=NC1)cc([N+](=O)[O-])cc2	78	0.191929	2.05361	4.43256	7.5	http://www.tsuruhara-seiyaku.co.jp/medical/member/if_pdf/i_c24n.pdf 13th July, 2019 Accessed.
299	Nitrendipine	C(=O)(OCC)C1=C(NC(=C(C(=O)OC)C1c2cc([N+](=O)[O-])ccc2)C)C	88	4.20852	4.18864	21.2726	20	J Pharm Sci. 2001;90(6):749-784.
300	Nizatidine	C(=C/[N+](=O)[O-])(\NCCSCc1nc(sc1)CN(C)C)/NC	100	2.1823	24.2875	3.33835	150	J Pharm Sci. 2001;90(6):749-784.
301	Nomifensine	c12c(cccc1C(c3ccccc3)CN(C2)C)N	100	0.012714	222.04	20.8975	112.5	Int Pharmacopsychiatry. 1982;17 Suppl 1:43-72.
302	Nordiazepam	O=C1Nc2c(C(c3ccccc3)=NC1)cc(Cl)cc2	99	0.435084	1.82603	5.57326	10	J Pharm Sci. 2001;90(6):749-784.
303	Norfloxacin	C(=O)(C1C(=O)c2c(N(C=1)CC)cc(c(F)c2)N3CCNCC3)O	34	3.32197	7.09352	0.0131469	400	https://www.drugs.com 13th July, 2019 Accessed.
304	Nortriptyline	C1(c2c(cccc2)CCc3c1cccc3)=CCCNC	100	0.000386	154.797	14.3548	14	https://www.info.pmda.go.jp/go 13th July, 2019 Accessed.
305	Ofloxacin	C(=O)(C1C(=O)c2c3c(c(c(F)c2)N4CC[NH+](CC4)C)OCC(N3C=1)C)[O-]	100	4.58974	8.75313	0.0880698	360	https://file.wuxuwang.com/jpyaopin/400061_6241006F1148_1_011_1F.pdf 13th July, 2019 Accessed.
306	Olsalazine	C(=O)(C1C(=O)C=C/C(=N/Nc2cc(C(=O)O)c(O)cc2)/C=1)O	2	0.021319	264.829	0.635229	2500	J Pharm Sci. 2001;90(6):749-784.
307	Omeprazole	O=S(c1nc2c(cc(OC)cc2)[nH]1)Cc3c(c(OC)c(cn3)C)C	95	0.387324	46.3981	19.4644	20	Ther Drug Monit. 1990;12(2):163-172.
308	Ondansetron	O=C1c2c3c(n(c2CCC1Cn4c(ncc4)C)C)cccc3	100	0.009317	214.297	18.64	8	J Pharm Sci. 2001;90(6):749-784.
309	Oseltamivir	C(=O)(OCC)C1=C[C@@H](OC(CC)CC)[C@H](NC(=O)C)[C@@H](N)C1	80	0.006558	2054.51	2.17746	275	Clin Pharmacokinet. 1999;37(6):471-484.
310	Ouabain	O=C1OCC(=C1)[C@@H]2[C@@]3([C@@](O)([C@H]4[C@@H]([C@@]5([C@@](O)(C[C@@H](O[C@@H]6O[C@H]([C@H](O)[C@@H](O)[C@H]6O)C)C[C@H]5O)CC4)CO)[C@H](O)C3)CC2)C	1.4	0.011853	199.073	0.184508	8	J Pharm Sci. 2001;90(6):749-784.
311	Oxacillin	C(=O)(c1c(-c2ccccc2)noc1C)N[C@@H]3C(=O)N4[C@@H](C(=O)O)C(S[C@@H]43)(C)C	33	0.021664	375.779	0.188701	4500	Pathol Biol (Paris). 1982;30(6 Pt 2):473-475.
312	Oxatomide	c12c(n(c(n1)[O-])CCC[NH+]3CCN(C(c4ccccc4)c5ccccc5)CC3)cccc2	100	1.4102	29.9903	19.8581	60	J Pharm Sci. 2001;90(6):749-784.
313	Oxazepam	O=C1C(N=C(c2c(ccc(Cl)c2)N1)c3ccccc3)O	92.8	0.362956	6.7134	7.13217	15	J Pharm Sci. 2001;90(6):749-784.
314	Oxiracetam	C(=O)(CN1C(=O)CC(O)C1)N	75	0.047617	28388.9	0.418814	2000	Eur J Drug Metab Pharmacokinet. 1984;9(3):267-274.
315	Oxprenolol	O(c1c(OCC(O)CNC(C)C)cccc1)CC=C	95	5.58e-05	2504.49	1.43128	160	J Pharm Sci. 2001;90(6):749-784.
316	Oxyfedrine	C(=O)(c1cc(OC)ccc1)CCN[C@H]([C@@H](c2ccccc2)O)C	85	0.008789	282.283	11.3365	56	Methods Find Exp Clin Pharmacol. 1995;17(3):185-191.
317	Oxytetracycline	C(=O)(C1C(=O)[C@@H](N(C)C)[C@H]2[C@](C(=O)C3=C(c4c([C@@](O)([C@H]3[C@@H]2O)C)cccc4O)O)(C=1O)O)N	60	0.522374	98.9338	0.0197673	375	https://www.medicines.org.uk/emc 14th July, 2019 Accessed.
318	Pafenolol	C(=O)(NC(C)C)NCCc1ccc(OCC(O)CNC(C)C)cc1	58	0.000147	503.364	0.527055	40	J Pharm Sci. 2001;90(6):749-784.
319	Pantoprazole	O=S(c1nc2c(cc(OC(F)F)cc2)[nH]1)Cc3c(OC)c(OC)ccn3	100	0.183258	187.062	15.1237	40	Eur J Clin Pharmacol. 1993;44(6):575-578.
320	Papaverine	O(c1c(OC)cc2c(c(ncc2)Cc3cc(OC)c(OC)cc3)c1)C	100	16.3742	1.71483	11.0029	80	Pharmacol Toxicol. 1988 May;62(5):308-310.
321	Paricalcitol	C([C@H](/C=C/[C@H]([C@@H]1[C@@]2([C@H](/C(=C/C=C3C[C@@H](O)C[C@H](O)C3)/CCC2)CC1)C)C)C)(O)(C)C	86.1	0.000682	0.14272	5.34545	0.0015	https://www.mayoclinic.org/drugs-supplements 14th July, 2019 Accessed.
322	Paromomycin	O([C@@H]1O[C@@H]([C@@H](O[C@H]2O[C@H]([C@@H](O)[C@H](O)[C@H]2N)CN)[C@H]1O)CO)[C@H]3[C@H](O[C@H]4O[C@@H]([C@@H](O)[C@H](O)[C@H]4N)CO)[C@@H](N)C[C@H]([C@@H]3O)N	3	0.013198	743.697	4.05e-05	600	https://www.mayoclinic.org/drugs-supplements 14th July, 2019 Accessed.
323	Pefloxacin	C(=O)(C1C(=O)c2c(N(C=1)CC)cc(c(F)c2)N3CCN(CC3)C)O	95	6.22177	7.79555	0.435556	400	J Antimicrob Chemother. 1986 Apr;17 Suppl B:65-79.
324	Penciclovir	O=C1c2c(n(cn2)CCC(CO)CO)NC(=N1)N	10	0.673605	191.526	0.0915413	500	Xenobiotica. 1994;24(4):357-68.	**
325	Phencyclidine	c1(C2(N3CCCCC3)CCCCC2)ccccc1	95	0.000517	153.035	24.4999	1	Clin Pharmacol Ther. 1982 May;31(5):625-34.
326	Phenethicillin	C(=O)(C(Oc1ccccc1)C)N[C@@H]2C(=O)N3[C@@H](C(=O)O)C(S[C@@H]32)(C)C	78	0.000159	719.439	0.12569	250	https://medicaldialogues.in 14th July, 2019 Accessed.
327	Phenglutarimide	N(CCC1(C(=O)NC(=O)CC1)c2ccccc2)(CC)CC	100	0.000124	212.605	0.603797	20	https://www.sdrugs.com 14th July, 2019 Accessed.
328	Phenobarbital	O=C1C(C(=O)NC(=O)N1)(c2ccccc2)CC	100	2.05028	52.4565	20.1472	100	Eur J Clin Pharmacol. 1982;23(1):87-92.
329	Phenoxymethylpenicillin	C(=O)(N[C@@H]1C(=O)N2[C@@H](C(=O)O)C(S[C@@H]21)(C)C)COc3ccccc3	38	1.03e-05	854.183	0.105564	22	J Pharm Sci. 2001;90(6):749-784.
330	Phenytoin	O=C1C(c2ccccc2)(c3ccccc3)NC(=O)N1	90	14.304	28.9698	27.2391	400	J Pharm Sci. 2001;90(6):749-784.
331	Pindolol	O(c1c2c(ccc1)[nH]cc2)CC(O)CNC(C)C	100	0.001943	631.439	0.900005	900	J Pharm Sci. 2001;90(6):749-784.
332	Pirbuterol	C(NCC(c1nc(c(O)cc1)CO)O)(C)(C)C	60	3.71e-06	637.702	0.770099	10	J Pharm Sci. 2001;90(6):749-784.
333	Pirmenol	C(c1ncccc1)(c2ccccc2)(O)CCCN3[C@H](CCC[C@H]3C)C	95	0.000605	237.293	1.85106	150	J Cardiovasc Pharmacol. 1983 Jul-Aug;5(4):632-7.
334	Piroxicam	C(=O)(C1=C(c2c(S(=O)(=O)N1C)cccc2)O)Nc3ncccc3	100	0.240005	50.4779	7.88889	20	J Pharm Sci. 2001;90(6):749-784.
335	Piroximone	C(=O)(C1=C(NC(=O)N1)CC)c2ccncc2	81	0.347316	8.23961	0.28402	48	J Pharm Sci. 2001;90(6):749-784.
336	Practolol	C(=O)(Nc1ccc(OCC(O)CNC(C)C)cc1)C	100	0.000152	2265.56	0.610062	312.5	J Pharm Sci. 2001;90(6):749-784.
337	Pralidoxime	O=[NH+]/C=C1/N(C=CC=C/1)C	15	6.05705	845.304	59.7684	3750	Arch Ophthalmol. 1969 Dec;82(6):830-835.
338	Pravastatin	C(=O)(O[C@@H]1[C@H]2C(C=C[C@@H]([C@@H]2CC[C@@H](O)C[C@@H](O)CC(=O)O)C)=C[C@@H](O)C1)[C@H](CC)C	34	0.001614	435.744	0.447217	20	J Pharm Sci. 2001;90(6):749-784.
339	Praziquantel	C(=O)(N1CC(=O)N2C(c3c(cccc3)CC2)C1)C4CCCCC4	100	38.3556	41.1914	46.8604	1680	J Pharm Sci. 2001;90(6):749-784.
340	Prazosin	C(=O)(c1occc1)N2CCN(c3nc4c(c(n3)N)cc(OC)c(OC)c4)CC2	86	0.003811	129.54	8.42998	1	J Pharm Sci. 2001;90(6):749-784.
341	Prednisolone	C(=O)([C@@]1([C@@]2([C@H]([C@H]3[C@@H]([C@@]4(C(=CC(=O)C=C4)CC3)C)[C@@H](O)C2)CC1)C)O)CO	99	0.492185	34.6234	13.132	30	J Pharm Sci. 2001;90(6):749-784.
342	Prednisone	C(=O)([C@@]1([C@@]2([C@H]([C@H]3[C@H](C(=O)C2)[C@@]4(C(=CC(=O)C=C4)CC3)C)CC1)C)O)CO	95	0.578175	14.6615	14.5646	13	https://www.info.pmda.go.jp/go 14th July, 2019 Accessed.
343	Probenecid	C(=O)(c1ccc(S(N(CCC)CCC)(=O)=O)cc1)O	100	0.003816	344.96	2.31949	500	https://www.info.pmda.go.jp/go 14th July, 2019 Accessed.
344	Procainamide	C(=O)(c1ccc(cc1)N)NCCN(CC)CC	85	0.001278	762.104	0.891198	375	https://www.info.pmda.go.jp/go 14th July, 2019 Accessed.
345	Procyclidine	C(c1ccccc1)(O)(C2CCCCC2)CCN3CCCC3	100	8.22e-05	185.186	9.90514	10	Eur J Clin Pharmacol. 1985;28(1):73-78.
346	Progesterone	C(=O)([C@@H]1[C@@]2([C@H]([C@H]3[C@@H]([C@@]4(C(=CC(=O)CC4)CC3)C)CC2)CC1)C)C	100	0.465491	1.21161	10.1632	1.8	J Pharm Sci. 2001;90(6):749-784.
347	Propiverine	C(C(OCCC)(c1ccccc1)c2ccccc2)(=O)OC3CCN(CC3)C	84	0.006344	191.517	21.0209	15	J Pharm Sci. 2001;90(6):749-784.
348	Propranolol	O(c1c2c(ccc1)cccc2)CC(O)CNC(C)C	99	0.000897	493.406	3.31132	300	J Pharm Sci. 2001;90(6):749-784.
349	Propylthiouracil	O=C1C=C(NC(=S)N1)CCC	90	4.45523	84.7425	4.01041	400	J Pharm Sci. 2001;90(6):749-784.
350	Proxyphylline	O=C1c2c(ncn2CC(O)C)N(C(=O)N1C)C	100	0.059655	3099.35	1.33724	299.9	Eur J Clin Pharmacol. 1981 Jan;19(2):149-155.
351	Pyridostigmine	C(N(C)C)(=O)Oc1c[n+](ccc1)C	10	0.000137	110941	3.96202	120	Eur J Clin Pharmacol. 1980 Nov;18(5):423-428.
352	Quinapril	C(=O)(OCC)[C@H](CCc1ccccc1)[NH2+][C@H](C(=O)N2[C@H](C(=O)[O-])Cc3c(cccc3)C2)C	61	0.174965	57.2803	13.7951	20	J Clin Pharmacol. 1996 May;36(5):414-421.
353	Quinidine	O(c1cc2c(nccc2[C@H](O)[C@@H]3N4C[C@H](C=C)[C@H](C3)CC4)cc1)C	100	0.045406	224.719	12.4108	330	J Pharm Sci. 2001;90(6):749-784.
354	Quinine	O(c1cc2c(nccc2[C@@H](O)[C@H]3N4C[C@H](C=C)[C@H](C3)CC4)cc1)C	80	0.089161	224.719	13.195	648	https://reference.medscape.com 14th July, 2019 Accessed.
355	Rabeprazole	O=S(c1nc2c(cccc2)[nH]1)Cc3c(c(OCCCOC)ccn3)C	90	0.229886	76.7779	20.6764	20	Int J Clin Pharmacol Ther. 2006 Nov;44(11):557-565.
356	Raffinose	O([C@@]1(O[C@@H]([C@@H](O)[C@@H]1O)CO)CO)[C@H]2O[C@@H]([C@@H](O)[C@H](O)[C@H]2O)CO[C@H]3O[C@@H]([C@H](O)[C@H](O)[C@H]3O)CO	0.3	1.06228	9193.71	0.0824809	40320	Am J Physiol. 1981 Nov;241(5):G397-402.
357	Ramipril	C(=O)(OCC)[C@@H](N[C@H](C(=O)N1[C@H](C(=O)O)C[C@H]2[C@@H]1CCC2)C)CCc3ccccc3	60	0.013997	144.966	19.6611	2.5	https://www.mayoclinic.org/drugs-supplements 14th July, 2019 Accessed.
358	Ranitidine	C(=C/[N+](=O)[O-])(\NCCSCc1oc(cc1)CN(C)C)/NC	50	0.027842	177.489	0.387115	60	J Pharm Sci. 2001;90(6):749-784.
359	Reboxetine	O(c1c(OCC)cccc1)[C@H](c2ccccc2)[C@@H]3OCCNC3	100	3.48e-05	465.428	17.5261	0.7	Biopharm Drug Dispos. 1999;20(1):53-57.
360	Recainam	C(=O)(Nc1c(cccc1C)C)NCCCNC(C)C	80	0.00435	185.125	0.879113	500	J Pharm Sci. 2001;90(6):749-784.
361	Remoxipride	C(=O)(c1c(OC)c(Br)ccc1OC)NC[C@H]2N(CC)CCC2	100	0.000258	473.166	7.89545	20	Psychopharmacology (Berl). 1989;98(3):304-309.
362	Repaglinide	C(=O)(c1c(OCC)cc(cc1)CC(=O)N[C@H](c2c(N3CCCCC3)cccc2)CC(C)C)O	95	0.165892	9.58527	19.4389	2	Int J Clin Pharmacol Ther. 1998;36(12):636-641.
363	Reproterol	O=C1c2c(ncn2CCCNCC(c3cc(O)cc(O)c3)O)N(C(=O)N1C)C	60	0.002182	358.43	1.15256	20	Dtsch Med Wochenschr. 1977;102(16):619-623.	****
364	Ribavirin	C(=O)(c1nn(cn1)[C@@H]2O[C@@H]([C@@H](O)[C@H]2O)CO)N	42.5	0.077906	5261.75	0.141447	800	J Pharm Sci. 2001;90(6):749-784.
365	Rifabutin	C(=O)(O[C@@H]1[C@@H]([C@@H](OC)C=CO[C@@]2(C(=O)c3c4c(C(=O)C(=C5C4=NC6(N5)CCN(CC(C)C)CC6)NC(=O)C(=CC=C[C@@H]([C@H](O)[C@H]([C@@H](O)[C@H]1C)C)C)C)c(c(c3O2)C)O)C)C)C	53	9.72696	17.864	16.9758	300	Pharmacokinet. 1995;28(2):115-125.
366	Rifampin	C(=O)(O[C@@H]1[C@@H]([C@@H](OC)C=CO[C@@]2(C(=O)c3c4C(=O)C(C(=C(c4c(c(c3O2)C)O)O)NC(=O)C(=CC=C[C@@H]([C@H](O)[C@H]([C@@H](O)[C@H]1C)C)C)C)=CNN5CCN(CC5)C)C)C)C	100	0.867732	201.486	15.1212	600	Klin Wochenschr. 1985;63(23):1205-1211.
367	Rimiterol	c1(c(O)ccc([C@H](O)[C@@H]2NCCCC2)c1)O	48	2.79e-05	2596.79	1.02842	10	J Pharm Sci. 2001;90(6):749-784.
368	Risedronate	C(P(=O)([O-])O)(P(=O)(O)O)(O)Cc1ccc[nH+]c1	0.63	4.79e-08	82631.4	0.261399	30	Pharm Res. 2001;18(2):166-170.
369	Risperidone	O=C1C(=C(N=C2N1CCCC2)C)CCN3CCC(c4c5c(on4)cc(F)cc5)CC3	100	0.002073	133.651	14.1672	1	Clin Pharmacol Ther. 1993;54(3):257-268.
370	Ritonavir	C(N(Cc1nc(sc1)C(C)C)C)(=O)N[C@H](C(=O)N[C@@H](Cc2ccccc2)C[C@@H]([C@@H](NC(=O)OCc3scnc3)Cc4ccccc4)O)C(C)C	70	512.531	0.753618	20.0875	600	Clin Pharmacokinet. 1998;35(4):275-291.
371	Roquinimex	C(N(c1ccccc1)C)(=O)C2C(=O)N(c3c(C=2O)cccc3)C	100	0.002759	196.887	3.63356	5	Biopharm Drug Dispos. 1999;20(7):347-354.
372	Rosiglitazone	N(c1ncccc1)(CCOc2ccc(cc2)CC3C(=O)NC(=O)S3)C	100	10.428	7.05981	13.3025	150	Clin Ther. 2002;24(7):1062-1071.
373	Rosuvastatin	C(=O)([O-])C[C@H](O)C[C@@H](/C=C/c1c(-c2ccc(F)cc2)nc(N(S(=O)(=O)C)C)nc1C(C)C)O	50	0.009202	345.029	0.627721	40	Clin Ther. 2003;25(10):2553-2563.
374	Saccharin	O=C1c2c(S(=O)(=O)N1)cccc2	88	0.024119	471.699	0.201845	2000	J Pharm Sci. 2001;90(6):749-784.
375	salbutamol	C(NCC(c1cc(c(O)cc1)CO)O)(C)(C)C	100	3.72e-06	1960.56	0.880391	4	Br J Clin Pharmacol. 1986;22:587-593.
376	Salicylicacid	C(=O)(c1c(O)cccc1)O	100	0.001033	451.24	0.476856	750	https://www.aspirin.me/sites/g/files/vrxlpx16276/files/2021-02/Aspirin-500-en.pdf 14th July, 2019 Accessed.
377	Saquinavir	C(=O)(c1nc2c(cc1)cccc2)N[C@H](C(=O)N[C@H]([C@H](O)CN3[C@H](C(=O)NC(C)(C)C)C[C@H]4[C@@H](C3)CCCC4)Cc5ccccc5)CC(=O)N	80	17.4117	21.654	20.6082	600	Br J Clin Pharmacol. 1998;45(4):355-359.
378	Scopolamine	C(=O)(OC1CC2N(C(C3OC32)C1)C)C(c4ccccc4)CO	95	5.21e-05	595.8	1.2439	0.4	Pharm Res. 1989 Jun;6(6):481-485.
379	Selegiline	C(#C)CN([C@@H](Cc1ccccc1)C)C	100	0.010408	410.573	26.0557	10	Clin Pharmacol Ther. 1994;56(6 Pt 2):742-749.
380	Sematilide	C(=O)(c1ccc(NS(=O)(=O)C)cc1)NCCN(CC)CC	65	0.003105	202.569	0.381569	100	J Clin Pharmacol. 1996;36(2):131-143.
381	Sildenafil	O=S(=O)(c1cc(c(OCC)cc1)C2=NC(=O)c3c(c(nn3C)CCC)N2)N4CCN(CC4)C	92	0.525634	107.335	15.8923	93.8	Br J Clin Pharmacol. 2002;53 Suppl 1(Suppl 1):5S-12S.
382	Sitafloxacin	C(=O)(C1C(=O)c2c(c(Cl)c(c(F)c2)N3CC4([C@@H](C3)[NH3+])CC4)N(C=1)[C@H]5[C@@H](F)C5)[O-]	95	4.4452	0.93771	0.0347461	100	Antimicrob Agents Chemother. 1995;39(1):170-174.
383	Sitagliptin	C(=O)(N1Cc2nnc(C(F)(F)F)n2CC1)C[C@@H](Cc3c(F)cc(F)c(F)c3)N	95	0.96894	86.0467	16.9426	100	https://www.accessdata.fda.gov/drugsatfda_docs/label/2012/021995s019lbl.pdf 14th July, 2019 Accessed.
384	Solifenacin	C(=O)(O[C@@H]1C2CCN(C1)CC2)N3[C@H](c4c(cccc4)CC3)c5ccccc5	100	0.004065	195.615	16.0657	10	Drugs R D. 2004;5(2):73-81.
385	Sorivudine	O=C1C(/C=C/Br)=CN(C(=O)N1)[C@@H]2O[C@@H]([C@@H](O)[C@@H]2O)CO	82	0.005184	3448.5	0.256942	20	J Pharm Sci. 2001;90(6):749-784.
386	Sotalol	O=S(=O)(Nc1ccc(C(O)CNC(C)C)cc1)C	95	0.004009	1086.12	0.564609	240	J Pharm Sci. 2001;90(6):749-784.
387	Sparfloxacin	C(=O)(C1C(=O)c2c(c(F)c(c(F)c2N)N3C[C@@H](N[C@@H](C3)C)C)N(C=1)C4CC4)O	100	7.08179	1.14765	0.00487464	400	J Antimicrob Chemother. 1996;37 Suppl A:27-39.
388	Spironolactone	C(=O)(S[C@H]1[C@@H]2[C@@H]([C@@]3(C(=CC(=O)CC3)C1)C)CC[C@@]4([C@@]5(OC(=O)CC5)CC[C@H]42)C)C	73	20.8988	0.375774	5.34157	125	J Pharm Sci. 2001;90(6):749-784.
389	Stavudine	O=C1C(=CN(C(=O)N1)[C@@H]2O[C@@H](C=C2)CO)C	100	0.019456	2246.56	0.60947	40	J Pharm Sci. 2001;90(6):749-784.
390	Streptomycin	C(=N[C@@H]1[C@@H](O[C@@H]2O[C@H]([C@@](C=O)(O)[C@H]2O[C@@H]3O[C@H]([C@H](O)[C@@H](O)[C@@H]3NC)CO)C)[C@H](O)[C@@H](O)[C@H](N=C(N)N)[C@H]1O)(N)N	1	2.01e-05	11882.3	0.387714	1000	The Journal of Nutrition. 1952;47(2):275-287.
391	Sudoxicam	C(=O)(C1=C(c2c(S(=O)(=O)N1C)cccc2)O)Nc3nccs3	100	0.749691	43.4446	5.2775	50	The Journal of Pharmacology and Experimental Therapeutics. 1973;187(3):653-665.
392	Sufentanil	C(N(c1ccccc1)C2(COC)CCN(CCc3sccc3)CC2)(=O)CC	90	6.06491	167.503	43.7656	5000	https://www.sandoz.ca/sites/www.sandoz.ca/files/Sufentanil%20PMe%2020140702.doc.pdf 14th July, 2019 Accessed.
393	Sulfadiazine	O=S(=O)(c1ccc(cc1)N)Nc2ncccn2	85	5.76161	104.279	0.621029	1000	J Antimicrob Chemother. 1982 Jun;9(6):461-470.	*
394	Sulfamethoxazole	O=S(=O)(c1ccc(cc1)N)Nc2noc(c2)C	100	5.14722	31.0237	2.17195	1000	J Antimicrob Chemother. 1982 Jun;9(6):461-470.	*
395	Sulfasalazine	C(=O)(C1C(=O)C=C/C(=N\Nc2ccc(S(=O)(=O)Nc3ncccc3)cc2)/C=1)O	13	1.5511	201.247	0.68356	2000	J Pharm Sci. 2001;90(6):749-784.
396	Sulfinpyrazone	O=S(c1ccccc1)CCC2C(=O)N(c3ccccc3)N(C2=O)c4ccccc4	93	0.061306	273.12	7.65655	300	Br J Clin Pharmacol. 1982 Feb;13(2):177-185.
397	Sulfisoxazole	O=S(=O)(c1ccc(cc1)N)Nc2c(c(no2)C)C	100	1.58914	114.147	0.817319	562.5	J Pharmacokinet Biopharm. 1982;10(2):157-172.
398	Sulindac	C(=O)(O)CC1c2c(/C(/C=1C)=C\c3ccc(S(=O)C)cc3)ccc(F)c2	90	0.057242	245.323	17.3141	200	J Pharm Sci. 2001;90(6):749-784.
399	Sulpiride	C(=O)(c1c(OC)ccc(S(=O)(=O)N)c1)NCC2N(CC)CCC2	44	0.001158	683.995	0.970165	200	J Pharm Sci. 2001;90(6):749-784.
400	Sultopride	C(=O)(c1c(OC)ccc(S(=O)(=O)CC)c1)NCC2N(CC)CCC2	89	0.000845	394.633	0.324567	75	J Pharm Sci. 2001;90(6):749-784.
401	Sumatriptan	N(CCc1c2c(ccc(c2)CS(=O)(=O)NC)[nH]c1)(C)C	57	0.002721	220.726	0.489497	200	J Pharm Sci. 2001;90(6):749-784.
402	Suprofen	C(=O)(c1sccc1)c2ccc(C(C(=O)O)C)cc2	92	7.06741	22.3144	2.08645	200	Arzneimittelforschung. 1985;35(6):976-980.
403	Suramin	C(=O)(c1cc(c(cc1)C)NC(=O)c2cc(NC(=O)Nc3cc(C(=O)Nc4c(ccc(C(=O)Nc5c6c(S(=O)(O)=[OH+])cc(S(=O)([O-])=[OH+])cc6c(S(=O)(=O)[O-])cc5)c4)C)ccc3)ccc2)Nc7c8c(S(=O)(O)=[OH+])cc(S(=O)([O-])=[OH+])cc8c(S(=O)(=O)[O-])cc7	0.03	341.687	0.0476064	7.38e-06	1000	https://reference.medscape.com 14th June, 2019 Accessed.	*
404	Tacrolimus	C(=C/[C@H]1C[C@@H](OC)[C@H](O)CC1)(\[C@H]2OC(=O)[C@H]3N(C(=O)C(=O)[C@@]4(O[C@@H]([C@@H](OC)C[C@H]4C)[C@@H](OC)C[C@H](CC(=C[C@H](C(=O)C[C@H](O)[C@H]2C)CC=C)C)C)O)CCCC3)/C	15	0.996767	3.0741	15.754	5	Clin Pharmacol Ther. 2001 Jan;69(1):24-31.
405	Talinolol	C(=O)(Nc1ccc(OCC(O)CNC(C)(C)C)cc1)NC2CCCCC2	65	0.000496	313.715	0.818097	50	Biopharm Drug Dispos. 1995 Jul;16(5):403-14.
406	Tamsulosin	O=S(=O)(c1c(OC)ccc(c1)C[C@H](NCCOc2c(OCC)cccc2)C)N	100	7.66e-05	262.01	6.05391	0.4	J Pharm Sci. 1997 Oct;86(10):1156-1161.
407	Tegaserod	C(=N/CCCCC)(\NN/C=C1/c2c(N=C/1)ccc(OC)c2)/N	50	1.35e-06	376.262	0.436106	12	Br J Clin Pharmacol. 1999;47(5):483-491.
408	Telmisartan	C(=O)(c1c(-c2ccc(cc2)Cn3c4c(c(cc(-c5nc6c(n5C)cccc6)c4)C)nc3CCC)cccc1)O	90	0.037931	215.742	10.9893	40	J Pharm Sci. 2001;90(6):749-784.
409	Tenidap	C(=O)(N1C(=O)/C(=C(/c2sccc2)\O)/c3c1ccc(Cl)c3)N	89	0.18092	144.65	10.763	120	J Pharm Sci. 2001;90(6):749-784.
410	Tenoxicam	C(=O)(C1=C(c2c(S(=O)(=O)N1C)ccs2)O)Nc3ncccc3	100	1.32813	29.578	10.9006	55	J Pharm Sci. 2001;90(6):749-784.
411	Terazosin	C(=O)(N1CCN(c2nc3c(c(n2)N)cc(OC)c(OC)c3)CC1)C4OCCC4	90	0.006561	383.882	18.3428	7.5	J Pharm Sci. 2001;90(6):749-784.
412	Terbutaline	C(NCC(c1cc(O)cc(O)c1)O)(C)(C)C	62	1.33e-05	2704.06	0.903886	5	J Pharm Sci. 2001;90(6):749-784.
413	Terodiline	C(NC(CC(c1ccccc1)c2ccccc2)C)(C)(C)C	100	0.000888	198.728	23.0425	25	Pharmacol Toxicol. 1993;73(3):153-158.
414	Tesaglitazar	C(=O)([C@@H](OCC)Cc1ccc(OCCc2ccc(OS(=O)(=O)C)cc2)cc1)O	100	4.61e-05	332.109	0.889473	1	Drug Metab Dispos. 2004 Sep;32(9):923-929.
415	Testosterone	O=C1C=C2[C@@]([C@@H]3[C@H]([C@H]4[C@@]([C@@H](O)CC4)(CC3)C)CC2)(CC1)C	100	1.30898	6.56313	12.4219	20	J Pharm Sci. 2001;90(6):749-784.
416	Tetracycline	C(=O)(C1C(=O)[C@@H](N(C)C)[C@H]2[C@](C(=O)C3=C(c4c([C@@](O)([C@H]3C2)C)cccc4O)O)(C=1O)O)N	78	0.825089	70.2466	0.0166592	500	https://reference.medscape.com 15th July, 2019 Accessed.
417	Theophylline	O=C1c2c(nc[nH]2)N(C(=O)N1C)C	100	0.925647	217.063	2.00367	200	https://www.info.pmda.go.jp 15th July, 2019 Accessed.
418	Thiacetazone	C(=O)(Nc1ccc(/C=N/NC(=S)N)cc1)C	40	1.68539	35.1628	8.54749	150	J Pharm Sci. 2001;90(6):749-784.
419	Tiacrilast	C(=O)(/C=C/N1C(=O)c2c(N=C1)ccc(SC)c2)O	99	0.060207	253.917	0.480109	450	Int J Clin Pharmacol Res. 1987;7(2):121-127.
420	Tiagabine	C(c1c(ccs1)C)(c2c(ccs2)C)=CCC[NH+]3C[C@H](C(=O)[O-])CCC3	95	2.07231	0.747965	7.43809	8.5	https://www.rxlist.com/gabitril-drug.htm 15th July, 2019 Accessed.
421	Tilidine	C(=O)(OCC)[C@@]1(c2ccccc2)[C@H](N(C)C)C=CCC1	100	0.00742	250.735	19.4778	50	Arzneimittelforschung. 1989;39(10):1283-1288.
422	Timolol	C(NC[C@H](O)COc1c(nsn1)N2CCOCC2)(C)(C)C	95	0.026363	1064.03	21.2974	30	J Pharm Sci. 2001;90(6):749-784.
423	Tinidazole	O=S(=O)(CCn1c(ncc1[N+](=O)[O-])C)CC	100	3.81477	189.783	3.52465	2000	Drugs. 1976;11(6):423-440.
424	Tizanidine	Clc1c(c2c(nsn2)cc1)NC3=NCCN3	100	0.021481	74.21	6.28715	3	https://www.info.pmda.go.jp 15th July, 2019 Accessed.
425	Tocainide	C(=O)(C(N)C)Nc1c(cccc1C)C	100	0.012251	2389.45	2.64511	500	https://www.drugs.com 15th July, 2019 Accessed.
426	Tolbutamide	C(=O)(NS(=O)(=O)c1ccc(cc1)C)NCCCC	85	0.984368	196.264	14.8303	1000	https://www.medicines.org.uk/emc 15th July, 2019 Accessed.
427	Tolmesoxide	O=S(c1c(cc(OC)c(OC)c1)C)C	100	0.261571	1279.48	17.1509	300	J Pharm Sci. 2001;90(6):749-784.
428	Tolterodine	N(C(C)C)(C(C)C)CC[C@@H](c1c(O)ccc(c1)C)c2ccccc2	100	0.000116	190.168	21.6212	3.6	Int J Clin Pharmacol Ther. 1997;35(7):287-295.
429	Topiramate	O=S(=O)(OC[C@]12OC(O[C@H]1[C@@H]3OC(O[C@@H]3CO2)(C)C)(C)C)N	86	4.10554	81.0292	0.241253	650	J Pharm Sci. 2001;90(6):749-784.
430	Toremifene	C(=C(/c1ccccc1)\CCCl)(/c2ccc(OCCN(C)C)cc2)\c3ccccc3	100	15.1095	6.34136	21.0262	120	J Pharm Sci. 2001;90(6):749-784.
431	Torasemide	C(=O)(NS(=O)(=O)c1c(Nc2cc(ccc2)C)ccnc1)NC(C)C	96	0.147978	10.1981	8.56118	6	https://www.info.pmda.go.jp/go 31st May, 2023 Accessed.
432	Tramadol	N(C[C@@H]1[C@](c2cc(OC)ccc2)(O)CCCC1)(C)C	90	0.000361	433.42	2.28059	100	https://www.mayoclinic.org/drugs-supplements 15th July, 2019 Accessed.
433	Tranexamic acid	C(=O)([O-])C1CCC(C[NH3+])CC1	55	0.135258	3314.27	2.42961	650	https://www.mayoclinic.org/drugs-supplements 15th July, 2019 Accessed.
434	Trapidil	N(C1n2c(N=C(C=1)C)ncn2)(CC)CC	97	3.04011	37.4165	19.6318	100	https://image.packageinsert.jp/pdf.php?mode=1&yjcode=2171012F1203 15th July, 2019 Accessed.
435	Trazodone	O=C1N2C(=NN1CCCN3CCN(c4cc(Cl)ccc4)CC3)C=CC=C2	100	5.97623	7.96629	13.8891	100	Pharmacol Toxicol. 1992;71(2):150-153.
436	Triazolam	Clc1c(C2c3c(-n4c(nnc4C)CN=2)ccc(Cl)c3)cccc1	85	0.023293	0.426297	4.86328	0.25	Clin Pharm. 1991 Jul;10(7):539-543.
437	Trimethoprim	O(c1c(OC)cc(cc1OC)Cc2c(nc(nc2)N)N)C	97	0.003501	216.466	3.03748	2	J Pharm Sci. 2001;90(6):749-784.
438	Trovafloxacin	C(=O)(C1C(=O)c2c(nc(c(F)c2)N3C[C@@H]4C([C@@H]4C3)[NH3+])N(c5c(F)cc(F)cc5)C=1)[O-]	95	10.5098	2.22426	0.106646	200	https://www.drugs.com 15th July, 2019 Accessed.
439	Urapidil	O=C1N(C(=O)C=C(N1C)NCCCN2CCN(c3c(OC)cccc3)CC2)C	100	0.016108	488.54	11.0317	30	Drugs. 1988;35(Suppl. 6):34-39.
440	Valproic Acid	C(=O)(C(CCC)CCC)O	100	0.018919	668.371	15.8258	400	https://www.mayoclinic.org/drugs-supplements 15th July, 2019 Accessed.
441	Valsartan	C(N([C@H](C(=O)O)C(C)C)Cc1ccc(-c2c(-c3nn[nH]n3)cccc2)cc1)(=O)CCCC	55	0.014743	296.631	14.3552	80	Eur J Clin Pharmacol. 1997;52(2):115-120.
442	Vancomycin	C(=O)([C@H](NC)CC(C)C)N[C@H]1C(=O)N[C@H](C(=O)N[C@H]2C(=O)N[C@H]3C(=O)N[C@H](C(=O)N[C@H](C(=O)O)c4c(-c5c(O)ccc3c5)c(O)cc(O)c4)[C@@H](c6cc(Cl)c(Oc7c(O[C@@H]8O[C@@H]([C@@H](O)[C@H](O)[C@H]8O[C@@H]9O[C@H]([C@H]([C@@](N)(C9)C)O)C)CO)c(Oc%10c(Cl)cc(cc%10)[C@H]1O)cc2c7)cc6)O)CC(=O)N	5	3.68299	15.9292	0.603327	125	https://www.mayoclinic.org/drugs-supplements 15th July, 2019 Accessed.
443	Vardenafil	O=S(=O)(c1cc(c(OCC)cc1)C2=NC(=O)c3c(nc(n3N2)CCC)C)N4CCN(CC)CC4	90	133.977	4.25595	24.6955	750	https://www.drugs.com 15th July, 2019 Accessed.
444	Venlafaxine	N(CC(c1ccc(OC)cc1)C2(O)CCCCC2)(C)C	97	0.000504	279.175	11.8777	50	J Pharm Sci. 2001;90(6):749-784.
445	Verapamil	C(C(c1cc(OC)c(OC)cc1)(C(C)C)CCCN(CCc2cc(OC)c(OC)cc2)C)#N	100	0.223064	139.303	18.3725	120	J Pharm Sci. 2001;90(6):749-784.
446	Vigabatrin	C(=O)([O-])CCC(C=C)[NH3+]	58	0.141028	14228.6	0.881439	2000	J Pharm Sci. 2001;90(6):749-784.
447	Viloxazine	O(c1c(OCC)cccc1)CC2OCCNC2	98	0.001542	3520.63	4.58368	200	J Pharm Sci. 2001;90(6):749-784.
448	Warfarin	C(=O)(CC(C1C(=O)Oc2c(C=1O)cccc2)c3ccccc3)C	98	0.094006	35.9708	18.4236	5	J Pharm Sci. 2001;90(6):749-784.
449	Xamoterol	C(=O)(N1CCOCC1)NCCNCC(O)COc2ccc(O)cc2	5	0.002646	1825.58	0.875307	125	J Pharm Sci. 2001;90(6):749-784.
450	Ximoprofen	C(=O)(C(c1ccc(cc1)C2CC(=NO)CCC2)C)O	98	0.013306	189.211	9.2308	30	J Pharm Sci. 2001;90(6):749-784.
451	Xipamide	C(=O)(c1c(O)cc(Cl)c(S(=O)(=O)N)c1)Nc2c(cccc2C)C	97	0.032725	152.64	1.07712	20	https://www.medicines.org.uk/emc 15th July, 2019 Accessed.
452	Zalcitabine	O=C1N=C(C=CN1[C@@H]2O[C@H](CO)CC2)N	100	0.000548	1252.61	0.364679	0.8	http://www.lap.jp/lap2/data/kusuri/ddc.html 15th July, 2019 Accessed.
453	Zaleplon	C(#N)c1c2N=CC=C(c3cc(N(C(=O)C)CC)ccc3)n2nc1	100	0.624985	7.60133	10.5834	5	Biopharm Drug Dispos. 1999 Apr;20(3):171-175.
454	Zanamivir	C(=O)(C1O[C@@H]([C@@H]([C@H](O)CO)O)[C@H](NC(=O)C)[C@H](C=1)[NH+]=C(N)N)[O-]	11	0.079962	4088.74	0.0849443	500	https://www.info.pmda.go.jp/go 15th July, 2019 Accessed.
455	Zidovudine	N(=[N+]=[N-])[C@@H]1[C@H](O[C@@H](N2C(=O)NC(=O)C(=C2)C)C1)CO	100	0.436775	1386.31	1.69573	600	J Pharm Sci. 2001;90(6):749-784.
456	Ziprasidone	O=C1Nc2c(cc(c(Cl)c2)CCN3CCN(c4c5c(sn4)cccc5)CC3)C1	90	11.4416	0.92308	10.9723	30	Br J Clin Pharmacol. 2000;49(Suppl. 1):275-335.
457	Zofenopril	C(=O)(SC[C@H](C(=O)N1[C@H](C(=O)O)C[C@H](Sc2ccccc2)C1)C)c3ccccc3	96	0.199759	94.5079	17.5503	45	Clin Drug Invest. 2000;20(5).
458	Zolmitriptan	N(CCc1c2c(ccc(c2)C[C@@H]3NC(=O)OC3)[nH]c1)(C)C	92	7.38e-05	209.545	0.59464	3.8	Br J Clin Pharmacol. 1998 Nov;46(5):433-439.
459	Zolpidem	C(N(C)C)(=O)Cc1c(-c2ccc(cc2)C)nc3n1C=C(C=C3)C	100	0.114466	39.7686	12.5584	5	https://www.drugs.com 15th July, 2019 Accessed.
460	Zopiclone	C(=O)(OC1c2c(C(=O)N1c3ncc(Cl)cc3)nccn2)N4CCN(CC4)C	100	0.005164	567.366	12.2681	7.5	https://www.drugs.com 15th July, 2019 Accessed.

## Sheet: Table S2
Descriptors	Description
MWt	Molecular Weight (g/mol)
SssssN	Atom-type E-state index for >N+< groups (onium)
Pi_Q3	Third component of the autocorrelation vector of Hückel pi atomic charges
SdsN	Atom-type E-state index for =N- groups
N_Phsphr	Number of phosphorus atoms
AlphaAE	Alpha Amino Ester Flag
Pi_Q6	Sixth component of the autocorrelation vector of Hückel pi atomic charges
SaaO	Atom-type E-state index for aOa groups
N_Ntrgen	Number of nitrogens
N_Sulfur	Number of sulfurs
SaadC	Atom-type E-state index for =Caa groups
SdNH	Atom-type E-state index for =NH groups
H_AlAcid	Compounds with one or more carboxylate groups attached to aliphatic carbons
H_AlPyri	Compounds with at least one pyridine ring
SdS	Atom-type E-state index for =S groups
N_Fluorn	Number of fluorines
N_Iodine	Number of iodines
StdN	Atom-type E-state index for #N= groups (azide)
SsSH	Atom-type E-state index for -SH groups
Phsporat_P(=O)O-	Number of Phosphorate groups
Triazo__-N-N-N-	Number of Triazo groups
Oxadiazo_-N-O-N-	Number of Oxadiazo groups
Thiadiaz_-N-S-N-	Number of Thiadiazo groups
Imide___O=C(N-)C=O	Number of Imide groups
H_MultiN	Compounds with at least one of the following: - four or more aromatic nitrogens - no aromatic and two or more aliphatic nitrogens. Exactly one aliphatic N must be attached to C(=O), C(=S), or S(=O) - two or more aromatic and two or more aliphatic nitrogens. All aliphatic nitrogens must be attached to C(=O), C(=S), or S(=O)
SaaaN	Atom-type E-state index for aaNa groups (N-fused rings)
Urea____>NC(=O)N<	Number of Urea groups
Sulfamid_>NSO2N<	Number of Sulfamide groups
SdssS	Atom-type E-state index for >S= groups (sulfone)
SddsN	Atom-type E-state index for -N== groups (nitro)
HydxlAmn_>N-O-	Number of Hydroxyamine groups
Sulfone_>S(=O)=O	Number of Sulfone groups
SdCH2	Atom-type E-state index for =CH2 groups
F_AFRBWF	Average value of the freely rotatable bond weight factor. The FRBW factor is defined as the minimal atom count fraction per bond.
N_Chlorn	Number of chlorines
Hdrzine_>N-N<	Number of Hydrazine groups
F_TpleB	Triple bonds as fraction of total bonds.
N_Bromin	Number of bromines
